# Supplementary material for: Gut microbiota in dementia with Lewy bodies
Source: PubMed Central journal article supplement (PMC9734655; doi:10.1038/s41531-022-00428-2), 2022-12-09
Supplement: 41531_2022_428_MOESM1_ESM.pdf [file 41531_2022_428_MOESM1_ESM.pdf]

**Supplementary Table 1. The number of PD patients at each Hoehn & Yahr (HY) stage with (PDD+) or without (PDD-) cognitive decline defined by MMSE < 26**

| <b>HY stage</b> | <b>Number of samples</b> | <b>PDD+</b> | <b>PDD-</b> |
|-----------------|--------------------------|-------------|-------------|
| 1               | 31 (13.8%)               | 0 (0.0%)    | 31 (100.0%) |
| 2               | 99 (44.2%)               | 9 (9.1%)    | 90 (90.9%)  |
| 3               | 73 (32.6%)               | 14 (19.2%)  | 59 (80.8%)  |
| 4               | 18 (8.0%)                | 6 (33.3%)   | 12 (66.7%)  |
| 5               | 3 (1.3%)                 | 2 (66.7%)   | 1 (33.3%)   |
| Total           | 224 (100.0%)             | 31 (13.8%)  | 193 (86.2%) |

Supplementary Table 2a. Comparison of genera between controls and DLB

| Phylum                   | Class                      | Order                                      | Family                   | Genus                                   | P-value by ANCOM-BC | Q-value by ANCOM-BC | P-value by Wilcoxon rank sum test | Q-value by Wilcoxon rank sum test | ± <sup>a</sup> | Average relative abundance |
|--------------------------|----------------------------|--------------------------------------------|--------------------------|-----------------------------------------|---------------------|---------------------|-----------------------------------|-----------------------------------|----------------|----------------------------|
| <i>Firmicutes</i>        | <i>Clostridia</i>          | <i>Lachnospirale</i><br>s                  | <i>Lachnospiraceae</i>   | <i>Agathobacter</i>                     | 5.2E-06             | 4.2E-04*            | 1.9E-05                           | 5.3E-04*                          | -              | 0.0175                     |
| <i>Firmicutes</i>        | <i>Clostridia</i>          | <i>Lachnospirale</i><br>s                  | <i>Lachnospiraceae</i>   | <i>Lachnospiraceae</i> ND3<br>007_group | 1.0E-05             | 4.2E-04*            | 3.2E-04                           | 3.8E-03*                          | -              | 0.0053                     |
| <i>Firmicutes</i>        | <i>Clostridia</i>          | <i>Oscillospirale</i><br>s                 | <i>Butyricicoccaceae</i> | <i>Butyricicoccus</i>                   | 2.6E-05             | 7.2E-04*            | 1.4E-06                           | 1.2E-04*                          | -              | 0.0041                     |
| <i>Firmicutes</i>        | <i>Clostridia</i>          | <i>Lachnospirale</i><br>s                  | <i>Lachnospiraceae</i>   | <i>Coprococcus</i>                      | 3.7E-05             | 7.8E-04*            | 0.011                             | 0.044*                            | -              | 0.0063                     |
| <i>Actinobacteria</i>    | <i>Coriobacteriia</i>      | <i>Coriobacteriales</i>                    | <i>Coriobacteriaceae</i> | <i>Collinsella</i>                      | 1.7E-04             | 2.8E-03*            | 6.5E-03                           | 0.032*                            | +              | 0.0267                     |
| <i>Firmicutes</i>        | <i>Clostridia</i>          | <i>Oscillospirale</i><br>s                 | <i>Ruminococcaceae</i>   | <i>Faecalibacterium</i>                 | 5.8E-04             | 8.0E-03*            | 2.9E-06                           | 1.2E-04*                          | -              | 0.0544                     |
| <i>Actinobacteria</i>    | <i>Coriobacteriia</i>      | <i>Coriobacteriales</i>                    | <i>Eggerthellaceae</i>   | <i>Eggerthella</i>                      | 8.5E-04             | 9.9E-03*            | 1.0E-03                           | 7.6E-03*                          | +              | 0.0023                     |
| <i>Firmicutes</i>        | <i>Clostridia</i>          | <i>Lachnospirale</i><br>s                  | <i>Lachnospiraceae</i>   | <i>Fusicatenibacter</i>                 | 9.5E-04             | 9.9E-03*            | 4.9E-05                           | 8.3E-04*                          | -              | 0.0187                     |
| <i>Proteobacteria</i>    | <i>Gammaproteobacteria</i> | <i>Pasteurellales</i>                      | <i>Pasteurellaceae</i>   | <i>Haemophilus</i>                      | 1.1E-03             | 0.011*              | 5.0E-05                           | 8.3E-04*                          | -              | 0.0011                     |
| <i>Firmicutes</i>        | <i>Clostridia</i>          | <i>Lachnospirales</i>                      | <i>Lachnospiraceae</i>   | <i>Anaerostipes</i>                     | 3.9E-03             | 0.032*              | 0.021                             | 0.067                             | -              | 0.0146                     |
| <i>Firmicutes</i>        | <i>Clostridia</i>          | <i>Lachnospirale</i><br>s                  | <i>Lachnospiraceae</i>   | <i>[Ruminococcus]_torques_group</i>     | 6.3E-03             | 0.047*              | 9.6E-04                           | 7.6E-03*                          | +              | 0.0168                     |
| <i>Firmicutes</i>        | <i>Clostridia</i>          | <i>Lachnospirales</i>                      | <i>Lachnospiraceae</i>   | <i>[Eubacterium]_ventriosum_group</i>   | 0.015               | 0.10                | 6.9E-03                           | 0.032*                            | -              | 0.0030                     |
| <i>Firmicutes</i>        | <i>Clostridia</i>          | <i>Lachnospirales</i>                      | <i>Lachnospiraceae</i>   | <i>Lachnospira</i>                      | 0.020               | 0.13                | 5.2E-04                           | 5.4E-03*                          | -              | 0.0084                     |
| <i>Firmicutes</i>        | <i>Clostridia</i>          | <i>Peptostreptococcales-Tissierellales</i> | <i>Anaerovoracaceae</i>  | <i>Family_XIII_AD3011_group</i>         | 0.023               | 0.14                | 8.6E-04                           | 7.6E-03*                          | +              | 0.0013                     |
| <i>Verrucomicrobiota</i> | <i>Verrucomicrobiae</i>    | <i>Verrucomicrobiales</i>                  | <i>Akkermansiaceae</i>   | <i>Akkermansia</i>                      | 0.026               | 0.14                | 1.7E-03                           | 0.011*                            | +              | 0.0080                     |
| <i>Firmicutes</i>        | <i>Clostridia</i>          | <i>Lachnospirales</i>                      | <i>Lachnospiraceae</i>   | <i>[Eubacterium]_eligens_group</i>      | 0.029               | 0.15                | 0.94                              | 0.96                              | -              | 0.0038                     |

|                       |                            |                                            |                                  |                                      |       |      |         |          |   |        |
|-----------------------|----------------------------|--------------------------------------------|----------------------------------|--------------------------------------|-------|------|---------|----------|---|--------|
| <i>Bacteroidota</i>   | <i>Bacteroidia</i>         | <i>Bacteroidales</i>                       | <i>Prevotellaceae</i>            | <i>Prevotella</i>                    | 0.062 | 0.24 | 0.30    | 0.43     | - | 0.0291 |
| <i>Firmicutes</i>     | <i>Bacilli</i>             | <i>Erysipelotrichales</i>                  | <i>Erysipelatoclostridiaceae</i> | <i>Erysipelatoclostridium</i>        | 0.060 | 0.24 | 0.031   | 0.093    | + | 0.0072 |
| <i>Firmicutes</i>     | <i>Bacilli</i>             | <i>Erysipelotrichales</i>                  | <i>Erysipelotrichaceae</i>       | <i>[Clostridium]_innocuum_group</i>  | 0.052 | 0.24 | 1.6E-03 | 0.011*   | + | 0.0018 |
| <i>Firmicutes</i>     | <i>Negativicutes</i>       | <i>Acidaminococcales</i>                   | <i>Acidaminococaceae</i>         | <i>Phascolarctobacterium</i>         | 0.063 | 0.24 | 0.29    | 0.43     | - | 0.0087 |
| <i>Proteobacteria</i> | <i>Gammaproteobacteria</i> | <i>Burkholderiales</i>                     | <i>Sutterellaceae</i>            | <i>Sutterella</i>                    | 0.054 | 0.24 | 0.13    | 0.25     | - | 0.0043 |
| <i>Proteobacteria</i> | <i>Gammaproteobacteria</i> | <i>Enterobacteriales</i>                   | <i>Enterobacteriaceae</i>        | <i>Klebsiella</i>                    | 0.058 | 0.24 | 0.019   | 0.067    | + | 0.0086 |
| <i>Firmicutes</i>     | <i>Clostridia</i>          | <i>Lachnospirales</i>                      | <i>Lachnospiraceae</i>           | <i>Lachnospiraceae_NK4A136_group</i> | 0.069 | 0.25 | 0.021   | 0.067    | - | 0.0039 |
| <i>Firmicutes</i>     | <i>Clostridia</i>          | <i>Christensenellales</i>                  | <i>Christensenellaceae</i>       | <i>Christensenellaceae_R-7_group</i> | 0.082 | 0.25 | 3.6E-03 | 0.020*   | + | 0.0058 |
| <i>Firmicutes</i>     | <i>Clostridia</i>          | <i>Lachnospirales</i>                      | <i>Lachnospiraceae</i>           | <i>Tyzzrella</i>                     | 0.079 | 0.25 | 0.090   | 0.21     | + | 0.0056 |
| <i>Firmicutes</i>     | <i>Clostridia</i>          | <i>Oscillospirales</i>                     | <i>Oscillospiraceae</i>          | <i>UCG-005</i>                       | 0.078 | 0.25 | 0.013   | 0.051    | + | 0.0035 |
| <i>Firmicutes</i>     | <i>Clostridia</i>          | <i>Oscillospirales</i>                     | <i>Ruminococcaceae</i>           | <i>uncultured</i>                    | 0.080 | 0.25 | 3.2E-04 | 3.8E-03* | + | 0.0054 |
| <i>Firmicutes</i>     | <i>Clostridia</i>          | <i>Lachnospirales</i>                      | <i>Lachnospiraceae</i>           | <i>[Ruminococcus]_gnavus_group</i>   | 0.097 | 0.28 | 0.50    | 0.61     | + | 0.0103 |
| <i>Firmicutes</i>     | <i>Clostridia</i>          | <i>Lachnospirales</i>                      | <i>Lachnospiraceae</i>           | <i>Lachnoclostridium</i>             | 0.095 | 0.28 | 0.13    | 0.25     | + | 0.0098 |
| <i>Firmicutes</i>     | <i>Bacilli</i>             | <i>Lactobacillales</i>                     | <i>Lactobacillaceae</i>          | <i>Lactobacillus</i>                 | 0.14  | 0.38 | 4.0E-03 | 0.021*   | + | 0.0094 |
| <i>Bacteroidota</i>   | <i>Bacteroidia</i>         | <i>Bacteroidales</i>                       | <i>Bacteroidaceae</i>            | <i>Bacteroides</i>                   | 0.15  | 0.38 | 0.020   | 0.067    | - | 0.2069 |
| <i>Firmicutes</i>     | <i>Bacilli</i>             | <i>Erysipelotrichales</i>                  | <i>Erysipelatoclostridiaceae</i> | <i>Erysipelotrichaceae_UCG-003</i>   | 0.15  | 0.38 | 0.078   | 0.20     | - | 0.0083 |
| <i>Firmicutes</i>     | <i>Clostridia</i>          | <i>Lachnospirales</i>                      | <i>Lachnospiraceae</i>           | <i>Sellimonas</i>                    | 0.15  | 0.38 | 0.12    | 0.24     | + | 0.0020 |
| <i>Firmicutes</i>     | <i>Clostridia</i>          | <i>Oscillospirales</i>                     | <i>Oscillospiraceae</i>          | <i>NK4A214_group</i>                 | 0.18  | 0.43 | 0.049   | 0.13     | + | 0.0016 |
| <i>Firmicutes</i>     | <i>Clostridia</i>          | <i>Peptostreptococcales-Tissierellales</i> | <i>Peptostreptococcaceae</i>     | <i>Intestinibacter</i>               | 0.19  | 0.44 | 0.21    | 0.32     | + | 0.0055 |
| <i>Firmicutes</i>     | <i>Bacilli</i>             | <i>Lactobacillales</i>                     | <i>Enterococcaceae</i>           | <i>Enterococcus</i>                  | 0.20  | 0.45 | 0.86    | 0.89     | - | 0.0024 |

|                         |                            |                                       |                            |                                     |      |      |         |        |   |        |
|-------------------------|----------------------------|---------------------------------------|----------------------------|-------------------------------------|------|------|---------|--------|---|--------|
| <i>Firmicutes</i>       | <i>Clostridia</i>          | <i>Oscillospirales</i>                | <i>Ruminococcaceae</i>     | <i>CAG-352</i>                      | 0.20 | 0.45 | 0.74    | 0.80   | - | 0.0169 |
| <i>Proteobacteria</i>   | <i>Gammaproteobacteria</i> | <i>Enterobacterales</i>               | <i>Enterobacteriaceae</i>  | <i>Enterobacter</i>                 | 0.21 | 0.45 | 0.084   | 0.21   | - | 0.0023 |
| <i>Firmicutes</i>       | <i>Negativicutes</i>       | <i>Veillonellales-Selenomonadales</i> | <i>Veillonellaceae</i>     | <i>Dialister</i>                    | 0.21 | 0.46 | 0.30    | 0.43   | - | 0.0034 |
| <i>Desulfobacterota</i> | <i>Desulfovibrionia</i>    | <i>Desulfovibrionales</i>             | <i>Desulfovibrionaceae</i> | <i>Bilophila</i>                    | 0.24 | 0.49 | 0.21    | 0.32   | + | 0.0011 |
| <i>Firmicutes</i>       | <i>Bacilli</i>             | <i>Lactobacillales</i>                | <i>Streptococcaceae</i>    | <i>Streptococcus</i>                | 0.27 | 0.55 | 0.60    | 0.70   | - | 0.0378 |
| <i>Firmicutes</i>       | <i>Bacilli</i>             | <i>Bacillales</i>                     | <i>Bacillaceae</i>         | <i>Bacillus</i>                     | 0.28 | 0.55 | 0.11    | 0.23   | - | 0.0014 |
| <i>Bacteroidota</i>     | <i>Bacteroidia</i>         | <i>Bacteroidales</i>                  | <i>Marinifilaceae</i>      | <i>Odoribacter</i>                  | 0.30 | 0.56 | 0.21    | 0.32   | - | 0.0021 |
| <i>Firmicutes</i>       | <i>Clostridia</i>          | <i>Clostridiales</i>                  | <i>Clostridiaceae</i>      | <i>Clostridium_sensu_stricto_1</i>  | 0.30 | 0.56 | 0.12    | 0.24   | + | 0.0066 |
| <i>Firmicutes</i>       | <i>Clostridia</i>          | <i>Oscillospirales</i>                | <i>Ruminococcaceae</i>     | <i>Subdoligranulum</i>              | 0.31 | 0.56 | 0.060   | 0.16   | - | 0.0243 |
| <i>Bacteroidota</i>     | <i>Bacteroidia</i>         | <i>Bacteroidales</i>                  | <i>Barnesiellaceae</i>     | <i>Copro bacter</i>                 | 0.31 | 0.57 | 0.19    | 0.31   | - | 0.0012 |
| <i>Firmicutes</i>       | <i>Clostridia</i>          | <i>Lachnospirales</i>                 | <i>Lachnospiraceae</i>     |                                     | 0.36 | 0.59 | 0.65    | 0.74   | - | 0.0113 |
| <i>Firmicutes</i>       | <i>Clostridia</i>          | <i>Lachnospirales</i>                 | <i>Lachnospiraceae</i>     | <i>Blautia</i>                      | 0.36 | 0.59 | 0.29    | 0.43   | - | 0.0649 |
| <i>Firmicutes</i>       | <i>Clostridia</i>          | <i>Lachnospirales</i>                 | <i>Lachnospiraceae</i>     | <i>uncultured</i>                   | 0.36 | 0.59 | 0.98    | 0.99   | - | 0.0113 |
| <i>Firmicutes</i>       | <i>Clostridia</i>          | <i>Oscillospirales</i>                | <i>Ruminococcaceae</i>     |                                     | 0.34 | 0.59 | 0.30    | 0.43   | - | 0.0054 |
| <i>Firmicutes</i>       | <i>Clostridia</i>          | <i>Oscillospirales</i>                | <i>Ruminococcaceae</i>     | <i>[Eubacterium]_siraenum_group</i> | 0.36 | 0.59 | 0.53    | 0.65   | - | 0.0011 |
| <i>Firmicutes</i>       | <i>Clostridia</i>          | <i>Oscillospirales</i>                | <i>Ruminococcaceae</i>     | <i>Ruminococcus</i>                 | 0.38 | 0.61 | 0.99    | 0.99   | - | 0.0119 |
| <i>Firmicutes</i>       | <i>Clostridia</i>          | <i>Oscillospirales</i>                | <i>Oscillospiraceae</i>    | <i>Oscillibacter</i>                | 0.40 | 0.62 | 0.14    | 0.27   | + | 0.0017 |
| <i>Bacteroidota</i>     | <i>Bacteroidia</i>         | <i>Bacteroidales</i>                  | <i>Tannerellaceae</i>      | <i>Parabacteroides</i>              | 0.42 | 0.64 | 0.12    | 0.24   | + | 0.0191 |
| <i>Firmicutes</i>       | <i>Clostridia</i>          | <i>Oscillospirales</i>                | <i>Oscillospiraceae</i>    | <i>uncultured</i>                   | 0.42 | 0.64 | 2.7E-03 | 0.016* | + | 0.0020 |
| <i>Firmicutes</i>       | <i>Bacilli</i>             | <i>Erysipelotrichales</i>             | <i>Erysipelotrichaceae</i> | <i>Turicibacter</i>                 | 0.45 | 0.66 | 0.34    | 0.46   | - | 0.0022 |

|                       |                            |                                                        |                                                        |                                                        |      |      |       |       |   |        |
|-----------------------|----------------------------|--------------------------------------------------------|--------------------------------------------------------|--------------------------------------------------------|------|------|-------|-------|---|--------|
| <i>Proteobacteria</i> | <i>Gammaproteobacteria</i> | <i>Burkholderiales</i>                                 | <i>Sutterellaceae</i>                                  | <i>Parasutterella</i>                                  | 0.50 | 0.72 | 0.03  | 0.10  | - | 0.0019 |
| <i>Firmicutes</i>     | <i>Bacilli</i>             | <i>Erysipelotrichales</i>                              | <i>Erysipelotrichaceae</i>                             | <i>Holdemanella</i>                                    | 0.52 | 0.74 | 0.59  | 0.70  | + | 0.0126 |
| <i>Bacteroidota</i>   | <i>Bacteroidia</i>         | <i>Bacteroidales</i>                                   | <i>Barnesiellaceae</i>                                 | <i>Barnesiella</i>                                     | 0.53 | 0.74 | 0.73  | 0.80  | + | 0.0031 |
| <i>Firmicutes</i>     | <i>Clostridia</i>          | <i>Clostridia</i><br><i>UCG-014</i>                    | <i>Clostridia</i><br><i>UCG-014</i>                    | <i>Clostridia</i><br><i>UCG-014</i>                    | 0.57 | 0.77 | 0.34  | 0.46  | + | 0.0031 |
| <i>Firmicutes</i>     | <i>Clostridia</i>          | <i>Oscillospirales</i>                                 | <i>Ruminococcaceae</i>                                 | <i>Incertae_Sedis</i>                                  | 0.56 | 0.77 | 0.19  | 0.31  | + | 0.0045 |
| <i>Firmicutes</i>     | <i>Clostridia</i>          | <i>Peptostreptococcales</i> -<br><i>Tissierellales</i> | <i>Peptostreptococcaceae</i>                           | <i>Romboutsia</i>                                      | 0.58 | 0.77 | 0.71  | 0.79  | - | 0.0091 |
| <i>Firmicutes</i>     | <i>Negativicutes</i>       | <i>Selenomonadales</i>                                 | <i>Veillonellaceae</i>                                 | <i>Megasphaera</i>                                     | 0.57 | 0.77 | 0.38  | 0.49  | - | 0.0041 |
| <i>Actinobacteria</i> | <i>Actinobacteria</i>      | <i>Bifidobacteriales</i>                               | <i>Bifidobacteriaceae</i>                              | <i>Bifidobacterium</i>                                 | 0.67 | 0.83 | 0.19  | 0.31  | + | 0.0595 |
| <i>Firmicutes</i>     | <i>Clostridia</i>          | <i>Lachnospirales</i>                                  | <i>Lachnospiraceae</i>                                 | <i>[Ruminococcus]_gaurv<br/>reauui_group</i>           | 0.68 | 0.83 | 0.19  | 0.31  | - | 0.0041 |
| <i>Firmicutes</i>     | <i>Clostridia</i>          | <i>Oscillospirales</i>                                 | <i>Oscillospiraceae</i>                                | <i>Colidextribacter</i>                                | 0.67 | 0.83 | 0.83  | 0.87  | + | 0.0012 |
| <i>Firmicutes</i>     | <i>Clostridia</i>          | <i>Oscillospirales</i>                                 | <i>Oscillospiraceae</i>                                | <i>Flavonifractor</i>                                  | 0.66 | 0.83 | 0.17  | 0.31  | + | 0.0014 |
| <i>Proteobacteria</i> | <i>Gammaproteobacteria</i> | <i>Enterobacteriales</i>                               | <i>Enterobacteriaceae</i>                              |                                                        | 0.65 | 0.83 | 0.58  | 0.70  | + | 0.0034 |
| <i>Firmicutes</i>     | <i>Clostridia</i>          | <i>Peptostreptococcales</i> -<br><i>Tissierellales</i> | <i>Peptostreptococcaceae</i>                           | <i>Terrisporobacter</i>                                | 0.71 | 0.84 | 0.45  | 0.58  | + | 0.0016 |
| <i>Fusobacteriota</i> | <i>Fusobacteriia</i>       | <i>Fusobacteriales</i>                                 | <i>Fusobacteriaceae</i>                                | <i>Fusobacterium</i>                                   | 0.70 | 0.84 | 0.37  | 0.49  | + | 0.0056 |
| <i>Bacteroidota</i>   | <i>Bacteroidia</i>         | <i>Bacteroidales</i>                                   | <i>Prevotellaceae</i>                                  | <i>Paraprevotella</i>                                  | 0.74 | 0.86 | 0.11  | 0.24  | + | 0.0026 |
| <i>Firmicutes</i>     | <i>Clostridia</i>          | <i>Oscillospirales</i>                                 | <i>[Eubacterium]_c<br/>oprostanoligenes<br/>_group</i> | <i>[Eubacterium]_c<br/>oprostanoligenes<br/>_group</i> | 0.77 | 0.87 | 0.042 | 0.12  | + | 0.0109 |
| <i>Firmicutes</i>     | <i>Negativicutes</i>       | <i>Veillonellales</i> -<br><i>Selenomonadales</i>      | <i>Veillonellaceae</i>                                 | <i>Veillonella</i>                                     | 0.77 | 0.87 | 0.015 | 0.058 | - | 0.0052 |
| <i>Firmicutes</i>     | <i>Clostridia</i>          | <i>Lachnospirales</i>                                  | <i>Lachnospiraceae</i>                                 | <i>Roseburia</i>                                       | 0.79 | 0.87 | 0.024 | 0.074 | + | 0.0093 |

|                       |                            |                          |                           |                                   |      |      |         |        |   |        |
|-----------------------|----------------------------|--------------------------|---------------------------|-----------------------------------|------|------|---------|--------|---|--------|
| <i>Firmicutes</i>     | <i>Clostridia</i>          | <i>Oscillospirales</i>   | <i>Oscillospiraceae</i>   | <i>UCG-002</i>                    | 0.78 | 0.87 | 0.77    | 0.83   | + | 0.0073 |
| <i>Proteobacteria</i> | <i>Gammaproteobacteria</i> | <i>Enterobacterales</i>  | <i>Enterobacteriaceae</i> | <i>Escherichia-Shigella</i>       | 0.82 | 0.89 | 0.10    | 0.22   | + | 0.0100 |
| <i>Bacteroidota</i>   | <i>Bacteroidia</i>         | <i>Bacteroidales</i>     | <i>Rikenellaceae</i>      | <i>Alistipes</i>                  | 0.85 | 0.91 | 0.16    | 0.30   | + | 0.0132 |
| <i>Firmicutes</i>     | <i>Clostridia</i>          | <i>Monoglobales</i>      | <i>Monoglobaceae</i>      | <i>Monoglobus</i>                 | 0.85 | 0.91 | 0.61    | 0.70   | - | 0.0041 |
| <i>Bacteroidota</i>   | <i>Bacteroidia</i>         | <i>Bacteroidales</i>     | <i>Muribaculaceae</i>     | <i>Muribaculaceae</i>             | 0.89 | 0.93 | 0.83    | 0.87   | + | 0.0018 |
| <i>Firmicutes</i>     | <i>Negativicutes</i>       | <i>Acidaminococcales</i> | <i>Acidaminococcaeae</i>  | <i>Acidaminococcus</i>            | 0.90 | 0.94 | 0.38    | 0.49   | - | 0.0018 |
| <i>Bacteroidota</i>   | <i>Bacteroidia</i>         | <i>Bacteroidales</i>     | <i>Marinifilaceae</i>     | <i>Butyricimonas</i>              | 0.94 | 0.95 | 0.46    | 0.58   | - | 0.0011 |
| <i>Firmicutes</i>     | <i>Clostridia</i>          | <i>Lachnospirales</i>    | <i>Lachnospiraceae</i>    | <i>[Eubacterium]_hallii_group</i> | 0.95 | 0.95 | 8.9E-03 | 0.039* | - | 0.0116 |
| <i>Firmicutes</i>     | <i>Clostridia</i>          | <i>Lachnospirales</i>    | <i>Lachnospiraceae</i>    | <i>Dorea</i>                      | 0.94 | 0.95 | 0.10    | 0.22   | - | 0.0084 |

<sup>a</sup>Increased and decreased genera in DLB compared to controls are indicated by + and -, respectively.

Significantly different genera defined by *q*-values < 0.05 of both ANCOM-BC and Wilcoxon rank sum test are underlined.

\**Q*-value less than 0.05

**Supplementary Table 2b. Comparison of families between controls and DLB**

| Phylum                   | Class                      | Order                                      | Family                     | <i>P</i> -value by ANCOM-BC | <i>Q</i> -value by ANCOM-BC | <i>P</i> -value by Wilcoxon rank sum test | <i>Q</i> -value by Wilcoxon rank sum test | ± <sup>a</sup> | Average relative abundance |
|--------------------------|----------------------------|--------------------------------------------|----------------------------|-----------------------------|-----------------------------|-------------------------------------------|-------------------------------------------|----------------|----------------------------|
| <i>Actinobacteriota</i>  | <i>Coriobacteriia</i>      | <i>Coriobacteriales</i>                    | <i>Eggerthellaceae</i>     | 2.0E-08                     | 7.3E-07*                    | 1.0E-07                                   | 3.6E-06*                                  | +              | 0.0045                     |
| <i>Desulfobacterota</i>  | <i>Desulfovibrionia</i>    | <i>Desulfovibrionales</i>                  | <i>Desulfovibrionaceae</i> | 2.7E-05                     | 4.9E-04*                    | 0.016                                     | 0.045*                                    | +              | 0.0015                     |
| <i>Actinobacteriota</i>  | <i>Coriobacteriia</i>      | <i>Coriobacteriales</i>                    | <i>Coriobacteriaceae</i>   | 6.9E-05                     | 6.2E-04*                    | 5.2E-03                                   | 0.017*                                    | +              | 0.0267                     |
| <i>Firmicutes</i>        | <i>Clostridia</i>          | <i>Peptostreptococcales-Tissierellales</i> | <i>Anaerovoracaceae</i>    | 5.5E-05                     | 6.2E-04*                    | 1.9E-05                                   | 2.3E-04*                                  | +              | 0.0019                     |
| <i>Firmicutes</i>        | <i>Clostridia</i>          | <i>Oscillospirales</i>                     | <i>Ruminococcaceae</i>     | 1.9E-03                     | 0.013*                      | 2.1E-03                                   | 9.5E-03*                                  | -              | 0.1232                     |
| <i>Verrucomicrobiota</i> | <i>Verrucomicrobiae</i>    | <i>Verrucomicrobiales</i>                  | <i>Akkermansiaceae</i>     | 0.014                       | 0.082                       | 1.7E-03                                   | 8.8E-03*                                  | +              | 0.0080                     |
| <i>Firmicutes</i>        | <i>Clostridia</i>          | <i>Christensenellales</i>                  | <i>Christensenellaceae</i> | 0.037                       | 0.19                        | 1.6E-03                                   | 8.8E-03*                                  | +              | 0.0060                     |
| <i>Bacteroidota</i>      | <i>Bacteroidia</i>         | <i>Bacteroidales</i>                       | <i>Prevotellaceae</i>      | 0.045                       | 0.20                        | 0.90                                      | 0.90                                      | -              | 0.0378                     |
| <i>Firmicutes</i>        | <i>Clostridia</i>          | <i>Oscillospirales</i>                     | <i>Butyricoccaceae</i>     | 0.051                       | 0.20                        | 2.3E-06                                   | 4.1E-05*                                  | -              | 0.0043                     |
| <i>Firmicutes</i>        | <i>Bacilli</i>             | <i>Lactobacillales</i>                     | <i>Lactobacillaceae</i>    | 0.069                       | 0.25                        | 4.1E-03                                   | 0.015*                                    | +              | 0.0096                     |
| <i>Proteobacteria</i>    | <i>Gammaproteobacteria</i> | <i>Enterobacteriales</i>                   | <i>Enterobacteriaceae</i>  | 0.083                       | 0.27                        | 1.2E-03                                   | 8.6E-03*                                  | +              | 0.0256                     |
| <i>Bacteroidota</i>      | <i>Bacteroidia</i>         | <i>Bacteroidales</i>                       | <i>Bacteroidaceae</i>      | 0.17                        | 0.36                        | 2.0E-02                                   | 0.049*                                    | -              | 0.2069                     |
| <i>Bacteroidota</i>      | <i>Bacteroidia</i>         | <i>Bacteroidales</i>                       | <i>Mariniflaccaceae</i>    | 0.19                        | 0.36                        | 0.84                                      | 0.88                                      | +              | 0.0033                     |
| <i>Bacteroidota</i>      | <i>Bacteroidia</i>         | <i>Bacteroidales</i>                       | <i>Tannerellaceae</i>      | 0.19                        | 0.36                        | 0.078                                     | 0.15                                      | +              | 0.0196                     |
| <i>Firmicutes</i>        | <i>Bacilli</i>             | <i>Erysipelotrichales</i>                  | <i>Erysipelotrichaceae</i> | 0.16                        | 0.36                        | 0.059                                     | 0.12                                      | +              | 0.0183                     |
| <i>Firmicutes</i>        | <i>Clostridia</i>          | <i>Clostridiales</i>                       | <i>Clostridiaceae</i>      | 0.13                        | 0.36                        | 0.12                                      | 0.20                                      | +              | 0.0066                     |
| <i>Firmicutes</i>        | <i>Clostridia</i>          | <i>Lachnospirales</i>                      | <i>Lachnospiraceae</i>     | 0.17                        | 0.36                        | 0.048                                     | 0.10                                      | -              | 0.2443                     |
| <i>Firmicutes</i>        | <i>Clostridia</i>          | <i>Monoglobales</i>                        | <i>Monoglobaceae</i>       | 0.17                        | 0.36                        | 0.61                                      | 0.70                                      | +              | 0.0041                     |

|                         |                            |                                            |                                              |      |      |         |          |   |        |
|-------------------------|----------------------------|--------------------------------------------|----------------------------------------------|------|------|---------|----------|---|--------|
| <i>Firmicutes</i>       | <i>Clostridia</i>          | <i>Oscillospirales</i>                     | <i>Oscillospiraceae</i>                      | 0.15 | 0.36 | 0.017   | 0.045*   | + | 0.0200 |
| <i>Bacteroidota</i>     | <i>Bacteroidia</i>         | <i>Bacteroidales</i>                       | <i>Muribaculaceae</i>                        | 0.34 | 0.47 | 0.78    | 0.85     | + | 0.0018 |
| <i>Firmicutes</i>       | <i>Bacilli</i>             | <i>Lactobacillales</i>                     | <i>Streptococcaceae</i>                      | 0.29 | 0.47 | 0.67    | 0.75     | - | 0.0387 |
| <i>Firmicutes</i>       | <i>Clostridia</i>          | <i>Clostridia UCG-014</i>                  | <i>Clostridia UCG-014</i>                    | 0.29 | 0.47 | 0.34    | 0.45     | + | 0.0031 |
| <i>Firmicutes</i>       | <i>Clostridia</i>          | <i>Oscillospirales</i>                     | <i>[Eubacterium]_coprostanoligenes_group</i> | 0.34 | 0.47 | 0.042   | 0.095    | + | 0.0109 |
| <i>Firmicutes</i>       | <i>Clostridia</i>          | <i>Peptostreptococcales-Tissierellales</i> | <i>Peptostreptococcaceae</i>                 | 0.32 | 0.47 | 0.16    | 0.24     | + | 0.0163 |
| <i>Firmicutes</i>       | <i>Negativicutes</i>       | <i>Acidaminococcales</i>                   | <i>Acidaminococcaceae</i>                    | 0.32 | 0.47 | 0.098   | 0.18     | - | 0.0105 |
| <i>Firmicutes</i>       | <i>Negativicutes</i>       | <i>Veillonellales-Selenomonadales</i>      | <i>Selenomonadaceae</i>                      | 0.31 | 0.47 | 0.57    | 0.68     | + | 0.0095 |
| <i>Bacteroidota</i>     | <i>Bacteroidia</i>         | <i>Bacteroidales</i>                       | <i>Barnesiellaceae</i>                       | 0.37 | 0.50 | 0.53    | 0.66     | + | 0.0045 |
| <i>Firmicutes</i>       | <i>Bacilli</i>             | <i>Erysipelotrichales</i>                  | <i>Erysipelatoclostridiaceae</i>             | 0.40 | 0.52 | 0.13    | 0.20     | + | 0.0189 |
| <i>Fusobacteriota</i>   | <i>Fusobacteriia</i>       | <i>Fusobacteriales</i>                     | <i>Fusobacteriaceae</i>                      | 0.42 | 0.52 | 0.45    | 0.58     | + | 0.0058 |
| <i>Bacteroidota</i>     | <i>Bacteroidia</i>         | <i>Bacteroidales</i>                       | <i>Rikenellaceae</i>                         | 0.51 | 0.58 | 0.12    | 0.20     | + | 0.0138 |
| <i>Firmicutes</i>       | <i>Bacilli</i>             | <i>Bacillales</i>                          | <i>Bacillaceae</i>                           | 0.50 | 0.58 | 0.17    | 0.25     | + | 0.0014 |
| <i>Firmicutes</i>       | <i>Negativicutes</i>       | <i>Veillonellales-Selenomonadales</i>      | <i>Veillonellaceae</i>                       | 0.49 | 0.58 | 9.8E-03 | 0.030*   | - | 0.0130 |
| <i>Actinobacteriota</i> | <i>Actinobacteria</i>      | <i>Bifidobacteriales</i>                   | <i>Bifidobacteriaceae</i>                    | 0.58 | 0.64 | 0.20    | 0.28     | + | 0.0596 |
| <i>Proteobacteria</i>   | <i>Gammaproteobacteria</i> | <i>Burkholderiales</i>                     | <i>Sutterellaceae</i>                        | 0.62 | 0.66 | 3.7E-03 | 0.015*   | - | 0.0061 |
| <i>Proteobacteria</i>   | <i>Gammaproteobacteria</i> | <i>Pasteurellales</i>                      | <i>Pasteurellaceae</i>                       | 0.80 | 0.82 | 5.0E-05 | 4.5E-04* | - | 0.0011 |
| <i>Firmicutes</i>       | <i>Bacilli</i>             | <i>Lactobacillales</i>                     | <i>Enterococcaceae</i>                       | 0.94 | 0.94 | 0.86    | 0.88     | + | 0.0024 |

<sup>a</sup>Increased and decreased families in DLB compared to controls are indicated by + and -, respectively.

Significantly different families defined by *q*-values < 0.05 of both ANCOM-BC and Wilcoxon rank sum test are underlined.

\**Q*-value less than 0.05



Supplementary Table 3a. Comparison of genera between controls and PD

| Phylum                   | Class                   | Order                                      | Family                     | Genus                                | P-value by ANCOM-BC | Q-value by ANCOM-BC | P-value by Wilcoxon rank sum test | Q-value by Wilcoxon rank sum test | ± <sup>a</sup> | Average relative abundance |
|--------------------------|-------------------------|--------------------------------------------|----------------------------|--------------------------------------|---------------------|---------------------|-----------------------------------|-----------------------------------|----------------|----------------------------|
| <i>Firmicutes</i>        | <i>Clostridia</i>       | <i>Oscillospirales</i>                     | <i>Butyricicoccaceae</i>   | <i>Butyricococcus</i>                | 8.8E-08             | 7.4E-6*             | 2.9E-08                           | 5.0E-07*                          | -              | 0.0033                     |
| <i>Firmicutes</i>        | <i>Clostridia</i>       | <i>Lachnospirales</i>                      | <i>Lachnospiraceae</i>     | <i>Coprococcus</i>                   | 1.3E-06             | 1.1E-04*            | 2.0E-04                           | 9.1E-04*                          | -              | 0.0048                     |
| <i>Firmicutes</i>        | <i>Clostridia</i>       | <i>Lachnospirales</i>                      | <i>Lachnospiraceae</i>     | <i>Blautia</i>                       | 3.6E-06             | 3.0E-04*            | 5.0E-06                           | 3.5E-05*                          | -              | 0.0550                     |
| <i>Firmicutes</i>        | <i>Clostridia</i>       | <i>Monoglobales</i>                        | <i>Monoglobaceae</i>       | <i>Monoglobus</i>                    | 1.2E-05             | 9.7E-04*            | 4.9E-04                           | 1.8E-03*                          | -              | 0.0031                     |
| <i>Firmicutes</i>        | <i>Clostridia</i>       | <i>Lachnospirales</i>                      | <i>Lachnospiraceae</i>     | <i>Fusicatenibacter</i>              | 2.5E-05             | 2.0E-03*            | 1.0E-05                           | 6.2E-05*                          | -              | 0.0158                     |
| <i>Firmicutes</i>        | <i>Clostridia</i>       | <i>Lachnospirales</i>                      | <i>Lachnospiraceae</i>     | <i>Lachnospiraceae ND3007 group</i>  | 5.3E-05             | 4.2E-03*            | 6.7E-05                           | 3.6E-04*                          | -              | 0.0044                     |
| <i>Firmicutes</i>        | <i>Clostridia</i>       | <i>Oscillospirales</i>                     | <i>Oscillospiraceae</i>    | <i>Oscillibacter</i>                 | 4.4E-04             | 0.032*              | 4.1E-08                           | 5.9E-07*                          | +              | 0.0026                     |
| <i>Firmicutes</i>        | <i>Clostridia</i>       | <i>Lachnospirales</i>                      | <i>Lachnospiraceae</i>     | <i>Agathobacter</i>                  | 5.4E-04             | 0.038*              | 8.2E-06                           | 5.4E-05*                          | -              | 0.0149                     |
| <i>Verrucomicrobiota</i> | <i>Verrucomicrobiae</i> | <i>Verrucomicrobiales</i>                  | <i>Akkermansiaceae</i>     | <i>Akkermansia</i>                   | 5.5E-04             | 0.039*              | 1.4E-04                           | 6.4E-04*                          | +              | 0.0122                     |
| <i>Firmicutes</i>        | <i>Clostridia</i>       | <i>Christensenellales</i>                  | <i>Christensenellaceae</i> | <i>Christensenellaceae R-7_group</i> | 8.4E-04             | 0.058               | 4.0E-07                           | 4.3E-06*                          | +              | 0.0082                     |
| <i>Firmicutes</i>        | <i>Clostridia</i>       | <i>Oscillospirales</i>                     | <i>Oscillospiraceae</i>    | <i>uncultured</i>                    | 9.5E-04             | 0.066               | 3.6E-09                           | 7.7E-08*                          | +              | 0.0028                     |
| <i>Bacteroidota</i>      | <i>Bacteroidia</i>      | <i>Bacteroidales</i>                       | <i>Rikenellaceae</i>       | <i>Alistipes</i>                     | 1.5E-03             | 0.10                | 6.3E-07                           | 5.9E-06*                          | +              | 0.0189                     |
| <i>Firmicutes</i>        | <i>Clostridia</i>       | <i>Lachnospirales</i>                      | <i>Lachnospiraceae</i>     | <i>Lachnospira</i>                   | 1.6E-03             | 0.11                | 6.1E-08                           | 7.4E-07*                          | -              | 0.0065                     |
| <i>Firmicutes</i>        | <i>Clostridia</i>       | <i>Oscillospirales</i>                     | <i>Ruminococcaceae</i>     | <i>uncultured</i>                    | 1.7E-03             | 0.11                | 3.0E-10                           | 8.5E-09*                          | +              | 0.0037                     |
| <i>Bacteroidota</i>      | <i>Bacteroidia</i>      | <i>Bacteroidales</i>                       | <i>Barnesiellaceae</i>     | <i>Barnesiella</i>                   | 1.8E-03             | 0.12                | 6.1E-03                           | 0.016*                            | +              | 0.0047                     |
| <i>Firmicutes</i>        | <i>Clostridia</i>       | <i>Lachnospirales</i>                      | <i>Lachnospiraceae</i>     | <i>Anaerostipes</i>                  | 2.3E-03             | 0.15                | 6.3E-03                           | 0.016*                            | -              | 0.0129                     |
| <i>Firmicutes</i>        | <i>Clostridia</i>       | <i>Peptostreptococcales-Tissierellales</i> | <i>Anaerovoracaceae</i>    | <i>Family XIII_A D3011_group</i>     | 2.3E-03             | 0.16                | 7.4E-11                           | 3.1E-09*                          | +              | 0.0020                     |

|                         |                            |                                            |                                  |                                       |         |      |         |          |   |        |
|-------------------------|----------------------------|--------------------------------------------|----------------------------------|---------------------------------------|---------|------|---------|----------|---|--------|
| <i>Firmicutes</i>       | <i>Clostridia</i>          | <i>Oscillospirales</i>                     | <i>Oscillospiraceae</i>          | <i>Colidextribacter</i>               | 3.1E-03 | 0.20 | 1.0E-04 | 5.0E-04* | + | 0.0018 |
| <i>Firmicutes</i>       | <i>Clostridia</i>          | <i>Oscillospirales</i>                     | <i>Ruminococcaceae</i>           | <i>Faecalibacterium</i>               | 3.2E-03 | 0.21 | 4.8E-06 | 3.5-E05* | - | 0.0487 |
| <i>Firmicutes</i>       | <i>Clostridia</i>          | <i>Oscillospirales</i>                     | <i>Ruminococcaceae</i>           | <i>Subdoligranulum</i>                | 4.0E-03 | 0.25 | 0.033   | 0.064    | - | 0.0229 |
| <i>Firmicutes</i>       | <i>Bacilli</i>             | <i>Lactobacillales</i>                     | <i>Lactobacillaceae</i>          | <i>Lactobacillus</i>                  | 5.1E-03 | 0.32 | 3.0E-03 | 9.2E-03* | + | 0.0175 |
| <i>Firmicutes</i>       | <i>Clostridia</i>          | <i>Lachnospirales</i>                      | <i>Lachnospiraceae</i>           | <i>[Ruminococcus]_gavreauii_group</i> | 9.7E-03 | 0.52 | 0.024   | 0.050*   | - | 0.0031 |
| <i>Firmicutes</i>       | <i>Clostridia</i>          | <i>Peptostreptococcales-Tissierellales</i> | <i>Peptostreptococcaceae</i>     | <i>Terrisporobacter</i>               | 0.011   | 0.56 | 0.45    | 0.59     | - | 0.0012 |
| <i>Firmicutes</i>       | <i>Clostridia</i>          | <i>Lachnospirales</i>                      | <i>Lachnospiraceae</i>           | <i>Roseburia</i>                      | 0.016   | 0.72 | 0.018   | 0.040*   | - | 0.0075 |
| <i>Firmicutes</i>       | <i>Clostridia</i>          | <i>Oscillospirales</i>                     | <i>Oscillospiraceae</i>          | <i>UCG-005</i>                        | 0.022   | 0.85 | 3.4E-04 | 1.3E-03* | + | 0.0044 |
| <i>Actinobacteriota</i> | <i>Actinobacteria</i>      | <i>Bifidobacteriales</i>                   | <i>Bifidobacteriaceae</i>        | <i>Bifidobacterium</i>                | 0.032   | 0.96 | 0.052   | 0.092    | + | 0.0697 |
| <i>Bacteroidota</i>     | <i>Bacteroidia</i>         | <i>Bacteroidales</i>                       | <i>Tannerellaceae</i>            | <i>Parabacteroides</i>                | 0.034   | 0.96 | 5.9E-03 | 0.016*   | + | 0.0199 |
| <i>Firmicutes</i>       | <i>Clostridia</i>          | <i>Peptostreptococcales-Tissierellales</i> | <i>Peptostreptococcaceae</i>     | <i>Intestinibacter</i>                | 0.043   | 0.96 | 0.12    | 0.19     | - | 0.0046 |
| <i>Firmicutes</i>       | <i>Bacilli</i>             | <i>Erysipelotrichales</i>                  | <i>Erysipelatoclostridiaceae</i> | <i>Erysipelotrichaceae_UCG-003</i>    | 0.050   | 0.96 | 0.082   | 0.13     | - | 0.0077 |
| <i>Firmicutes</i>       | <i>Clostridia</i>          | <i>Lachnospirales</i>                      | <i>Lachnospiraceae</i>           | <i>[Eubacterium]_hallii_group</i>     | 0.061   | 0.96 | 0.20    | 0.29     | - | 0.0112 |
| <i>Firmicutes</i>       | <i>Clostridia</i>          | <i>Oscillospirales</i>                     | <i>Ruminococcaceae</i>           | <i>[Eubacterium]_siraenum_group</i>   | 0.062   | 0.96 | 0.51    | 0.62     | - | 0.0012 |
| <i>Firmicutes</i>       | <i>Clostridia</i>          | <i>Oscillospirales</i>                     | <i>Oscillospiraceae</i>          | <i>NK4A214_group</i>                  | 0.066   | 0.96 | 9.5E-04 | 3.2E-03* | + | 0.0024 |
| <i>Bacteroidota</i>     | <i>Bacteroidia</i>         | <i>Bacteroidales</i>                       | <i>Bacteroidaceae</i>            | <i>Bacteroides</i>                    | 0.074   | 0.96 | 7.1E-03 | 0.017*   | - | 0.1976 |
| <i>Firmicutes</i>       | <i>Bacilli</i>             | <i>Erysipelotrichales</i>                  | <i>Erysipelotrichaceae</i>       | <i>Holdemanella</i>                   | 0.074   | 0.96 | 0.023   | 0.048*   | - | 0.0098 |
| <i>Firmicutes</i>       | <i>Negativicutes</i>       | <i>Veillonellales-Selenomonadales</i>      | <i>Veillonellaceae</i>           | <i>Dialister</i>                      | 0.078   | 0.96 | 0.16    | 0.24     | - | 0.0028 |
| <i>Firmicutes</i>       | <i>Clostridia</i>          | <i>Lachnospirales</i>                      | <i>Lachnospiraceae</i>           | <i>Tyzzereella</i>                    | 0.079   | 0.96 | 0.053   | 0.092    | + | 0.0057 |
| <i>Proteobacteria</i>   | <i>Gammaproteobacteria</i> | <i>Enterobacteriales</i>                   | <i>Enterobacteriaceae</i>        |                                       | 0.079   | 0.96 | 0.80    | 0.86     | - | 0.0023 |

|                       |                            |                                       |                                           |                                              |       |      |         |          |   |        |
|-----------------------|----------------------------|---------------------------------------|-------------------------------------------|----------------------------------------------|-------|------|---------|----------|---|--------|
| <i>Proteobacteria</i> | <i>Gammaproteobacteria</i> | <i>Enterobacteriales</i>              | <i>Enterobacteriaceae</i>                 | <i>Enterobacter</i>                          | 0.082 | 0.96 | 0.65    | 0.76     | - | 0.0017 |
| <i>Firmicutes</i>     | <i>Bacilli</i>             | <i>Erysipelotrichales</i>             | <i>Erysipelotrichaceae</i>                | <i>Faecalitalea</i>                          | 0.083 | 0.96 | 5.5E-03 | 0.015*   | + | 0.0017 |
| <i>Firmicutes</i>     | <i>Clostridia</i>          | <i>Clostridia vadinBB60 group</i>     | <i>Clostridia vadinBB60 group</i>         | <i>Clostridia vadinBB60 group</i>            | 0.092 | 0.96 | 4.1E-05 | 2.3E-04* | + | 0.0011 |
| <i>Firmicutes</i>     | <i>Clostridia</i>          | <i>Oscillospirales</i>                | <i>[Eubacterium] rostanoligenes_group</i> | <i>[Eubacterium] coprostanoligenes_group</i> | 0.11  | 0.96 | 3.1E-03 | 9.2E-03* | + | 0.0130 |
| <i>Firmicutes</i>     | <i>Clostridia</i>          | <i>Lachnospirales</i>                 | <i>Lachnospiraceae</i>                    |                                              | 0.13  | 0.96 | 0.054   | 0.092    | - | 0.0100 |
| <i>Bacteroidota</i>   | <i>Bacteroidia</i>         | <i>Bacteroidales</i>                  | <i>Barnesiellaceae</i>                    | <i>Coprobacter</i>                           | 0.16  | 0.96 | 0.48    | 0.61     | - | 0.0014 |
| <i>Firmicutes</i>     | <i>Bacilli</i>             | <i>Erysipelotrichales</i>             | <i>Erysipelatoclostridiaceae</i>          | <i>Erysipelatoclostridium</i>                | 0.16  | 0.96 | 7.2E-03 | 0.017*   | + | 0.0064 |
| <i>Firmicutes</i>     | <i>Clostridia</i>          | <i>Lachnospirales</i>                 | <i>Lachnospiraceae</i>                    | <i>Dorea</i>                                 | 0.17  | 0.96 | 0.044   | 0.081    | - | 0.0080 |
| <i>Proteobacteria</i> | <i>Gammaproteobacteria</i> | <i>Enterobacteriales</i>              | <i>Enterobacteriaceae</i>                 | <i>Klebsiella</i>                            | 0.18  | 0.96 | 0.61    | 0.74     | + | 0.0043 |
| <i>Firmicutes</i>     | <i>Negativicutes</i>       | <i>Veillonellales-Selenomonadales</i> | <i>Veillonellaceae</i>                    | <i>Veillonella</i>                           | 0.18  | 0.96 | 0.011   | 0.026*   | - | 0.0043 |
| <i>Firmicutes</i>     | <i>Clostridia</i>          | <i>Lachnospirales</i>                 | <i>Lachnospiraceae</i>                    | <i>Sellimonas</i>                            | 0.19  | 0.96 | 2.9E-04 | 1.2E-03* | + | 0.0026 |
| <i>Firmicutes</i>     | <i>Clostridia</i>          | <i>Oscillospirales</i>                | <i>Ruminococcaceae</i>                    |                                              | 0.21  | 0.96 | 4.1E-06 | 3.5E-05* | + | 0.0086 |
| <i>Firmicutes</i>     | <i>Clostridia</i>          | <i>Lachnospirales</i>                 | <i>Lachnospiraceae</i>                    | <i>[Eubacterium] eligens_group</i>           | 0.22  | 0.96 | 0.12    | 0.19     | + | 0.0049 |
| <i>Bacteroidota</i>   | <i>Bacteroidia</i>         | <i>Bacteroidales</i>                  | <i>Muribaculaceae</i>                     | <i>Muribaculaceae</i>                        | 0.23  | 0.96 | 0.44    | 0.59     | - | 0.0016 |
| <i>Firmicutes</i>     | <i>Clostridia</i>          | <i>Lachnospirales</i>                 | <i>Lachnospiraceae</i>                    | <i>[Eubacterium] ventriosum_group</i>        | 0.23  | 0.96 | 0.71    | 0.79     | - | 0.0031 |
| <i>Firmicutes</i>     | <i>Bacilli</i>             | <i>Lactobacillales</i>                | <i>Enterococcaceae</i>                    | <i>Enterococcus</i>                          | 0.25  | 0.96 | 0.23    | 0.32     | + | 0.0042 |
| <i>Firmicutes</i>     | <i>Clostridia</i>          | <i>Oscillospirales</i>                | <i>Ruminococcaceae</i>                    | <i>Incertae Sedis</i>                        | 0.28  | 0.96 | 1.1E-03 | 3.5E-03* | + | 0.0053 |
| <i>Firmicutes</i>     | <i>Clostridia</i>          | <i>Clostridia UCG-014</i>             | <i>Clostridia UCG-014</i>                 | <i>Clostridia UCG-014</i>                    | 0.30  | 0.96 | 0.019   | 0.041*   | + | 0.0048 |
| <i>Firmicutes</i>     | <i>Bacilli</i>             | <i>Lactobacillales</i>                | <i>Streptococcaceae</i>                   | <i>Streptococcus</i>                         | 0.30  | 0.96 | 0.62    | 0.74     | - | 0.0365 |
| <i>Firmicutes</i>     | <i>Bacilli</i>             | <i>Erysipelotrichales</i>             | <i>Erysipelotrichaceae</i>                | <i>Turicibacter</i>                          | 0.30  | 0.96 | 0.073   | 0.12     | + | 0.0034 |

|                         |                            |                                            |                              |                                      |      |      |         |          |   |        |
|-------------------------|----------------------------|--------------------------------------------|------------------------------|--------------------------------------|------|------|---------|----------|---|--------|
| <i>Firmicutes</i>       | <i>Bacilli</i>             | <i>Bacillales</i>                          | <i>Bacillaceae</i>           | <i>Bacillus</i>                      | 0.32 | 0.96 | 0.51    | 0.62     | - | 0.0018 |
| <i>Fusobacteriota</i>   | <i>Fusobacteriia</i>       | <i>Fusobacteriales</i>                     | <i>Fusobacteriaceae</i>      | <i>Fusobacterium</i>                 | 0.35 | 0.96 | 0.88    | 0.91     | + | 0.0052 |
| <i>Firmicutes</i>       | <i>Clostridia</i>          | <i>Oscillospirales</i>                     | <i>Ruminococcaceae</i>       | <i>UBA1819</i>                       | 0.35 | 0.96 | 2.2E-11 | 1.9E-09* | + | 0.0013 |
| <i>Proteobacteria</i>   | <i>Gammaproteobacteria</i> | <i>Burkholderiales</i>                     | <i>Sutterellaceae</i>        | <i>Parasutterella</i>                | 0.35 | 0.96 | 0.91    | 0.93     | - | 0.0019 |
| <i>Bacteroidota</i>     | <i>Bacteroidia</i>         | <i>Bacteroidales</i>                       | <i>Marinifilaceae</i>        | <i>Odoribacter</i>                   | 0.37 | 0.96 | 0.038   | 0.071    | + | 0.0031 |
| <i>Proteobacteria</i>   | <i>Gammaproteobacteria</i> | <i>Enterobacteriales</i>                   | <i>Enterobacteriaceae</i>    | <i>Escherichia-Shigella</i>          | 0.39 | 0.96 | 0.67    | 0.77     | - | 0.0077 |
| <i>Bacteroidota</i>     | <i>Bacteroidia</i>         | <i>Bacteroidales</i>                       | <i>Prevotellaceae</i>        | <i>Paraprevotella</i>                | 0.40 | 0.96 | 0.027   | 0.053    | + | 0.0029 |
| <i>Desulfobacterota</i> | <i>Desulfovibrionia</i>    | <i>Desulfovibrionales</i>                  | <i>Desulfovibrionaceae</i>   | <i>Bilophila</i>                     | 0.40 | 0.96 | 4.1E-03 | 0.012*   | - | 0.0012 |
| <i>Firmicutes</i>       | <i>Clostridia</i>          | <i>Lachnospirales</i>                      | <i>Lachnospiraceae</i>       | <i>Lachnoclostridium</i>             | 0.44 | 0.96 | 0.81    | 0.86     | - | 0.0090 |
| <i>Firmicutes</i>       | <i>Clostridia</i>          | <i>Lachnospirales</i>                      | <i>Lachnospiraceae</i>       | <i>[Ruminococcus]_gnavus_group</i>   | 0.53 | 0.96 | 0.92    | 0.93     | + | 0.0087 |
| <i>Firmicutes</i>       | <i>Clostridia</i>          | <i>Lachnospirales</i>                      | <i>Lachnospiraceae</i>       | <i>uncultured</i>                    | 0.59 | 0.96 | 2.7E-04 | 1.2E-03* | + | 0.0013 |
| <i>Firmicutes</i>       | <i>Bacilli</i>             | <i>Erysipelotrichales</i>                  | <i>Erysipelotrichaceae</i>   | <i>[Clostridium]_innocuum_group</i>  | 0.60 | 0.96 | 1.1E-03 | 3.5E-03* | - | 0.0015 |
| <i>Bacteroidota</i>     | <i>Bacteroidia</i>         | <i>Bacteroidales</i>                       | <i>Prevotellaceae</i>        | <i>Prevotella</i>                    | 0.61 | 0.96 | 0.19    | 0.28     | - | 0.0267 |
| <i>Firmicutes</i>       | <i>Clostridia</i>          | <i>Peptostreptococcales-Tissierellales</i> | <i>Peptostreptococcaceae</i> | <i>Romboutsia</i>                    | 0.63 | 0.96 | 0.85    | 0.90     | + | 0.0104 |
| <i>Firmicutes</i>       | <i>Clostridia</i>          | <i>Lachnospirales</i>                      | <i>Lachnospiraceae</i>       | <i>Lachnospiraceae_NK4A136_group</i> | 0.66 | 0.96 | 0.73    | 0.81     | - | 0.0043 |
| <i>Firmicutes</i>       | <i>Clostridia</i>          | <i>Oscillospirales</i>                     | <i>Oscillospiraceae</i>      | <i>UCG-002</i>                       | 0.71 | 0.96 | 0.090   | 0.14     | + | 0.0090 |
| <i>Actinobacteriota</i> | <i>Coriobacteriia</i>      | <i>Coriobacteriales</i>                    | <i>Eggerthellaceae</i>       | <i>Eggerthella</i>                   | 0.76 | 0.96 | 0.049   | 0.089    | - | 0.0022 |
| <i>Firmicutes</i>       | <i>Negativicutes</i>       | <i>Acidaminococcales</i>                   | <i>Acidaminococcaceae</i>    | <i>Acidaminococcus</i>               | 0.77 | 0.96 | 0.45    | 0.59     | + | 0.0020 |
| <i>Firmicutes</i>       | <i>Clostridia</i>          | <i>Lachnospirales</i>                      | <i>Lachnospiraceae</i>       | <i>[Ruminococcus]_torques_group</i>  | 0.80 | 0.96 | 0.44    | 0.59     | + | 0.0145 |

|                         |                            |                                       |                           |                                    |      |      |         |          |   |        |
|-------------------------|----------------------------|---------------------------------------|---------------------------|------------------------------------|------|------|---------|----------|---|--------|
| <i>Firmicutes</i>       | <i>Clostridia</i>          | <i>Oscillospirales</i>                | <i>Oscillospiraceae</i>   | <i>Flavonifractor</i>              | 0.80 | 0.96 | 0.014   | 0.032*   | - | 0.0016 |
| <i>Proteobacteria</i>   | <i>Gammaproteobacteria</i> | <i>Burkholderiales</i>                | <i>Sutterellaceae</i>     | <i>Sutterella</i>                  | 0.82 | 0.96 | 0.47    | 0.61     | + | 0.0044 |
| <i>Bacteroidota</i>     | <i>Bacteroidia</i>         | <i>Bacteroidales</i>                  | <i>Marinifilaceae</i>     | <i>Butyricimonas</i>               | 0.83 | 0.96 | 7.8E-04 | 2.8E-03* | + | 0.0015 |
| <i>Firmicutes</i>       | <i>Clostridia</i>          | <i>Clostridiales</i>                  | <i>Clostridiaceae</i>     | <i>Clostridium_sensu_stricto_1</i> | 0.83 | 0.96 | 0.20    | 0.29     | - | 0.0069 |
| <i>Firmicutes</i>       | <i>Clostridia</i>          | <i>Oscillospirales</i>                | <i>Ruminococcaceae</i>    | <i>Ruminococcus</i>                | 0.84 | 0.96 | 0.74    | 0.81     | - | 0.0123 |
| <i>Firmicutes</i>       | <i>Negativicutes</i>       | <i>Acidaminococcales</i>              | <i>Acidaminococcaceae</i> | <i>Phascolarctobacterium</i>       | 0.86 | 0.96 | 0.70    | 0.79     | - | 0.0088 |
| <i>Firmicutes</i>       | <i>Clostridia</i>          | <i>Oscillospirales</i>                | <i>Ruminococcaceae</i>    | <i>CAG-352</i>                     | 0.89 | 0.96 | 0.20    | 0.29     | - | 0.0192 |
| <i>Firmicutes</i>       | <i>Negativicutes</i>       | <i>Veillonellales-Selenomonadales</i> | <i>Veillonellaceae</i>    | <i>Megasphaera</i>                 | 0.96 | 0.96 | 0.63    | 0.75     | - | 0.0043 |
| <i>Actinobacteriota</i> | <i>Coriobacteriia</i>      | <i>Coriobacteriales</i>               | <i>Coriobacteriaceae</i>  | <i>Collinsella</i>                 | 0.96 | 0.96 | 0.94    | 0.94     | - | 0.0237 |

<sup>a</sup>Increased and decreased genera in PD compared to controls are indicated by + and -, respectively.

Significantly different genera defined by  $q$ -values < 0.05 of both ANCOM-BC and Wilcoxon rank sum test are underlined.

\* $Q$ -value less than 0.05

**Supplementary Table 3b. Comparison of families between controls and PD**

| Phylum                   | Class                   | Order                                      | Family                     | <i>P</i> -value by ANCOM-BC | <i>Q</i> -value by ANCOM-BC | <i>P</i> -value by Wilcoxon rank sum test | <i>Q</i> -value by Wilcoxon rank sum test | ± <sup>a</sup> | Average relative abundance |
|--------------------------|-------------------------|--------------------------------------------|----------------------------|-----------------------------|-----------------------------|-------------------------------------------|-------------------------------------------|----------------|----------------------------|
| <i>Firmicutes</i>        | <i>Clostridia</i>       | <i>Lachnospirales</i>                      | <i>Lachnospiraceae</i>     | 4.9E-08                     | 1.8E-06*                    | 2.8E-09                                   | 3.4E-08*                                  | -              | 0.216                      |
| <i>Firmicutes</i>        | <i>Clostridia</i>       | <i>Oscillospirales</i>                     | <i>Butyricicoccaceae</i>   | 1.2E-07                     | 4.20E-06                    | 9.1E-07                                   | 5.5E-06*                                  | -              | 0.004                      |
| <i>Firmicutes</i>        | <i>Clostridia</i>       | <i>Monoglobales</i>                        | <i>Monoglobaceae</i>       | 2.6E-06                     | 8.70E-05                    | 4.9E-04                                   | 1.6E-03*                                  | -              | 0.003                      |
| <i>Firmicutes</i>        | <i>Clostridia</i>       | <i>Oscillospirales</i>                     | <i>Oscillospiraceae</i>    | 1.2E-05                     | 4.1E-04*                    | 7.7E-10                                   | 1.4E-08*                                  | +              | 0.026                      |
| <i>Firmicutes</i>        | <i>Clostridia</i>       | <i>Christensenellales</i>                  | <i>Christensenellaceae</i> | 5.0E-04                     | 0.016*                      | 5.7E-08                                   | 5.2E-07*                                  | +              | 0.009                      |
| <i>Verrucomicrobiota</i> | <i>Verrucomicrobiae</i> | <i>Verrucomicrobiales</i>                  | <i>Akkermansiaceae</i>     | 7.2E-04                     | 0.022*                      | 1.4E-04                                   | 4.9E-04*                                  | +              | 0.012                      |
| <i>Firmicutes</i>        | <i>Clostridia</i>       | <i>Peptostreptococcales-Tissierellales</i> | <i>Anaerovoracaceae</i>    | 1.7E-03                     | 0.049*                      | 3.1E-11                                   | 1.1E-09*                                  | +              | 0.003                      |
| <i>Bacteroidota</i>      | <i>Bacteroidia</i>      | <i>Bacteroidales</i>                       | <i>Rikenellaceae</i>       | 2.3E-03                     | 0.068                       | 4.8E-07                                   | 3.5E-06*                                  | +              | 0.020                      |
| <i>Firmicutes</i>        | <i>Bacilli</i>          | <i>Lactobacillales</i>                     | <i>Lactobacillaceae</i>    | 6.7E-03                     | 0.18                        | 2.7E-03                                   | 7.1E-03*                                  | +              | 0.018                      |
| <i>Bacteroidota</i>      | <i>Bacteroidia</i>      | <i>Bacteroidales</i>                       | <i>Barnesiellaceae</i>     | 0.011                       | 0.28                        | 4.6E-03                                   | 0.010*                                    | +              | 0.007                      |
| <i>Bacteroidota</i>      | <i>Bacteroidia</i>      | <i>Bacteroidales</i>                       | <i>Tannerellaceae</i>      | 0.018                       | 0.45                        | 8.4E-04                                   | 2.3E-03*                                  | +              | 0.021                      |
| <i>Actinobacteriota</i>  | <i>Actinobacteria</i>   | <i>Bifidobacteriales</i>                   | <i>Bifidobacteriaceae</i>  | 0.034                       | 0.76                        | 0.051                                     | 0.092                                     | +              | 0.070                      |
| <i>Bacteroidota</i>      | <i>Bacteroidia</i>      | <i>Bacteroidales</i>                       | <i>Bacteroidaceae</i>      | 0.071                       | 0.96                        | 7.1E-03                                   | 0.015*                                    | -              | 0.198                      |
| <i>Bacteroidota</i>      | <i>Bacteroidia</i>      | <i>Bacteroidales</i>                       | <i>Marinifilaceae</i>      | 0.12                        | 0.96                        | 6.3E-05                                   | 2.5E-04*                                  | +              | 0.005                      |
| <i>Firmicutes</i>        | <i>Clostridia</i>       | <i>Oscillospirales</i>                     | <i>Ruminococcaceae</i>     | 0.13                        | 0.96                        | 0.24                                      | 0.33                                      | -              | 0.126                      |
| <i>Bacteroidota</i>      | <i>Bacteroidia</i>      | <i>Bacteroidales</i>                       | <i>Muribaculaceae</i>      | 0.13                        | 0.96                        | 0.38                                      | 0.51                                      | -              | 0.002                      |

|                         |                            |                                            |                                              |      |      |         |          |   |       |
|-------------------------|----------------------------|--------------------------------------------|----------------------------------------------|------|------|---------|----------|---|-------|
| <i>Firmicutes</i>       | <i>Clostridia</i>          | <i>Oscillospirales</i>                     | <i>[Eubacterium]_coprostanoligenes_group</i> | 0.14 | 0.96 | 3.1E-03 | 7.5E-03* | + | 0.013 |
| <i>Firmicutes</i>       | <i>Bacilli</i>             | <i>Bacillales</i>                          | <i>Bacillaceae</i>                           | 0.16 | 0.96 | 0.40    | 0.51     | - | 0.002 |
| <i>Firmicutes</i>       | <i>Clostridia</i>          | <i>Clostridia_vadinBB60_group</i>          | <i>Clostridia_vadinBB60_group</i>            | 0.20 | 0.96 | 4.1E-05 | 1.9E-04* | + | 0.001 |
| <i>Firmicutes</i>       | <i>Bacilli</i>             | <i>Lactobacillales</i>                     | <i>Streptococcaceae</i>                      | 0.22 | 0.96 | 0.69    | 0.75     | - | 0.037 |
| <i>Firmicutes</i>       | <i>Negativicutes</i>       | <i>Veillonellales-Selenomonadales</i>      | <i>Veillonellaceae</i>                       | 0.25 | 0.96 | 0.010   | 0.021*   | - | 0.012 |
| <i>Firmicutes</i>       | <i>Bacilli</i>             | <i>Erysipelotrichales</i>                  | <i>Erysipelatoclostridiaceae</i>             | 0.29 | 0.96 | 0.24    | 0.33     | - | 0.017 |
| <i>Firmicutes</i>       | <i>Bacilli</i>             | <i>Lactobacillales</i>                     | <i>Enterococcaceae</i>                       | 0.32 | 0.96 | 0.23    | 0.33     | + | 0.004 |
| <i>Firmicutes</i>       | <i>Clostridia</i>          | <i>Clostridia_UCG-014</i>                  | <i>Clostridia_UCG-014</i>                    | 0.39 | 0.96 | 0.019   | 0.037*   | + | 0.005 |
| <i>Fusobacteriota</i>   | <i>Fusobacteriia</i>       | <i>Fusobacteriales</i>                     | <i>Fusobacteriaceae</i>                      | 0.45 | 0.96 | 0.77    | 0.79     | + | 0.005 |
| <i>Proteobacteria</i>   | <i>Gammaproteobacteria</i> | <i>Enterobacteriales</i>                   | <i>Enterobacteriaceae</i>                    | 0.54 | 0.96 | 0.65    | 0.73     | - | 0.017 |
| <i>Firmicutes</i>       | <i>Clostridia</i>          | <i>Peptostreptococcales-Tissierellales</i> | <i>Peptostreptococcaceae</i>                 | 0.64 | 0.96 | 0.75    | 0.79     | - | 0.016 |
| <i>Firmicutes</i>       | <i>Clostridia</i>          | <i>Clostridiales</i>                       | <i>Clostridiaceae</i>                        | 0.73 | 0.96 | 0.21    | 0.33     | - | 0.007 |
| <i>Firmicutes</i>       | <i>Bacilli</i>             | <i>Erysipelotrichales</i>                  | <i>Erysipelotrichaceae</i>                   | 0.76 | 0.96 | 0.15    | 0.26     | - | 0.018 |
| <i>Bacteroidota</i>     | <i>Bacteroidia</i>         | <i>Bacteroidales</i>                       | <i>Prevotellaceae</i>                        | 0.78 | 0.96 | 0.23    | 0.33     | - | 0.036 |
| <i>Actinobacteriota</i> | <i>Coriobacteriia</i>      | <i>Coriobacteriales</i>                    | <i>Eggerthellaceae</i>                       | 0.78 | 0.96 | 7.3E-04 | 2.2E-03* | - | 0.004 |
| <i>Firmicutes</i>       | <i>Negativicutes</i>       | <i>Acidaminococcales</i>                   | <i>Acidaminococcaceae</i>                    | 0.81 | 0.96 | 0.65    | 0.73     | + | 0.011 |

|                         |                            |                                            |                            |      |      |         |          |   |       |
|-------------------------|----------------------------|--------------------------------------------|----------------------------|------|------|---------|----------|---|-------|
| <i>Actinobacteriota</i> | <i>Coriobacteriia</i>      | <i>Coriobacteriales</i>                    | <i>Coriobacteriaceae</i>   | 0.91 | 0.96 | 1.00    | 1.00     | - | 0.024 |
| <i>Desulfobacterota</i> | <i>Desulfovibrionia</i>    | <i>Desulfovibrionales</i>                  | <i>Desulfovibrionaceae</i> | 0.94 | 0.96 | 3.0E-05 | 1.6E-04* | + | 0.002 |
| <i>Firmicutes</i>       | <i>Negativicutes</i>       | <i>Veillonellales-<br/>Selenomonadales</i> | <i>Selenomonadaceae</i>    | 0.95 | 0.96 | 0.64    | 0.73     | - | 0.009 |
| <i>Proteobacteria</i>   | <i>Gammaproteobacteria</i> | <i>Burkholderiales</i>                     | <i>Sutterellaceae</i>      | 0.96 | 0.96 | 0.48    | 0.59     | - | 0.006 |

<sup>a</sup>Increased and decreased families in PD compared to controls are indicated by + and -, respectively.

Significantly different families defined by *q*-values < 0.05 of both ANCOM-BC and Wilcoxon rank sum test are underlined.

\**Q*-value less than 0.05



**Supplementary Table 4. Fifteen genera that most differentiated controls and DLB in random forest modeling in Supplementary Fig. 1**

| Phylum                         | Class                        | Order                                      | Family                          | Genus                                    | Feature importance |
|--------------------------------|------------------------------|--------------------------------------------|---------------------------------|------------------------------------------|--------------------|
| <i>Firmicutes</i>              | <i>Clostridia</i>            | <i>Peptostreptococcales-Tissierellales</i> | <i>Anaerovoracaceae</i>         | <i>Family_XIII_AD3011_group</i>          | 0.220              |
| <u><i>Firmicutes</i></u>       | <u><i>Clostridia</i></u>     | <u><i>Lachnospirales</i></u>               | <u><i>Lachnospiraceae</i></u>   | <u><i>Ruminococcus torques_group</i></u> | 0.088              |
| <i>Firmicutes</i>              | <i>Clostridia</i>            | <i>Oscillospirales</i>                     | <i>Ruminococcaceae</i>          | <i>uncultured</i>                        | 0.079              |
| <u><i>Actinobacteriota</i></u> | <u><i>Coriobacteriia</i></u> | <u><i>Coriobacteriales</i></u>             | <u><i>Eggerthellaceae</i></u>   | <u><i>Eggerthella</i></u>                | 0.077              |
| <i>Firmicutes</i>              | <i>Clostridia</i>            | <i>Peptostreptococcales-Tissierellales</i> | <i>Peptostreptococcaceae</i>    | <i>Intestinibacter</i>                   | 0.067              |
| <u><i>Actinobacteriota</i></u> | <u><i>Coriobacteriia</i></u> | <u><i>Coriobacteriales</i></u>             | <u><i>Coriobacteriaceae</i></u> | <u><i>Collinsella</i></u>                | 0.063              |
| <i>Firmicutes</i>              | <i>Bacilli</i>               | <i>Erysipelotrichales</i>                  | <i>Erysipelotrichaceae</i>      | <i>[Clostridium]_innocuum_group</i>      | 0.054              |
| <u><i>Firmicutes</i></u>       | <u><i>Clostridia</i></u>     | <u><i>Oscillospirales</i></u>              | <u><i>Ruminococcaceae</i></u>   | <u><i>Faecalibacterium</i></u>           | 0.052              |
| <i>Firmicutes</i>              | <i>Bacilli</i>               | <i>Lactobacillales</i>                     | <i>Streptococcaceae</i>         | <i>Streptococcus</i>                     | 0.052              |
| <u><i>Firmicutes</i></u>       | <u><i>Clostridia</i></u>     | <u><i>Lachnospirales</i></u>               | <u><i>Lachnospiraceae</i></u>   | <u><i>Coprococcus</i></u>                | 0.046              |
| <i>Proteobacteria</i>          | <i>Gammaproteobacteria</i>   | <i>Enterobacteriales</i>                   | <i>Enterobacteriaceae</i>       | <i>Klebsiella</i>                        | 0.046              |
| <i>Verrucomicrobiota</i>       | <i>Verrucomicrobiae</i>      | <i>Verrucomicrobiales</i>                  | <i>Akkermansiaceae</i>          | <i>Akkermansia</i>                       | 0.046              |
| <u><i>Firmicutes</i></u>       | <u><i>Clostridia</i></u>     | <u><i>Oscillospirales</i></u>              | <u><i>Butyricicoccaceae</i></u> | <u><i>Butyricicoccus</i></u>             | 0.040              |
| <i>Bacteroidota</i>            | <i>Bacteroidia</i>           | <i>Bacteroidales</i>                       | <i>Barnesiellaceae</i>          | <i>Barnesiella</i>                       | 0.036              |
| <i>Firmicutes</i>              | <i>Clostridia</i>            | <i>Lachnospirales</i>                      | <i>Lachnospiraceae</i>          | <i>Roseburia</i>                         | 0.035              |

Genera that were significantly changed in DLB compared to controls are underlined (see Supplementary Table. 2a).

Supplementary Table 5. Twenty-five genera that differentiated controls and PD in random forest modeling in Supplementary Fig. 2

| Phylum                  | Class                 | Order                                      | Family                    | Genus                           | Feature importance |
|-------------------------|-----------------------|--------------------------------------------|---------------------------|---------------------------------|--------------------|
| <i>Firmicutes</i>       | <i>Clostridia</i>     | <i>Oscillospirales</i>                     | <i>Ruminococcaceae</i>    | <i>UBA1819</i>                  | 0.102              |
| <i>Firmicutes</i>       | <i>Clostridia</i>     | <i>Lachnospirales</i>                      | <i>Lachnospiraceae</i>    | <i>Coproccoccus</i>             | 0.069              |
| <i>Firmicutes</i>       | <i>Clostridia</i>     | <i>Lachnospirales</i>                      | <i>Lachnospiraceae</i>    | <i>Blautia</i>                  | 0.060              |
| <i>Firmicutes</i>       | <i>Clostridia</i>     | <i>Lachnospirales</i>                      | <i>Lachnospiraceae</i>    | <i>Lachnospira</i>              | 0.053              |
| <i>Firmicutes</i>       | <i>Clostridia</i>     | <i>Peptostreptococcales-Tissierellales</i> | <i>Anaerovoracaceae</i>   | <i>Family_XIII_AD3011_group</i> | 0.052              |
| <i>Firmicutes</i>       | <i>Bacilli</i>        | <i>Lactobacillales</i>                     | <i>Lactobacillaceae</i>   | <i>Lactobacillus</i>            | 0.043              |
| <i>Firmicutes</i>       | <i>Clostridia</i>     | <i>Oscillospirales</i>                     | <i>Ruminococcaceae</i>    | <i>uncultured</i>               | 0.039              |
| <i>Firmicutes</i>       | <i>Clostridia</i>     | <i>Oscillospirales</i>                     | <i>Oscillospiraceae</i>   | <i>uncultured</i>               | 0.038              |
| <i>Bacteroidota</i>     | <i>Bacteroidia</i>    | <i>Bacteroidales</i>                       | <i>Bacteroidaceae</i>     | <i>Bacteroides</i>              | 0.038              |
| <i>Firmicutes</i>       | <i>Clostridia</i>     | <i>Lachnospirales</i>                      | <i>Lachnospiraceae</i>    |                                 | 0.037              |
| <i>Firmicutes</i>       | <i>Clostridia</i>     | <i>Oscillospirales</i>                     | <i>Ruminococcaceae</i>    | <i>Faecalibacterium</i>         | 0.037              |
| <i>Firmicutes</i>       | <i>Clostridia</i>     | <i>Oscillospirales</i>                     | <i>Butyricicoccaceae</i>  | <i>Butyricicoccus</i>           | 0.036              |
| <i>Firmicutes</i>       | <i>Clostridia</i>     | <i>Lachnospirales</i>                      | <i>Lachnospiraceae</i>    | <i>uncultured</i>               | 0.036              |
| <i>Bacteroidota</i>     | <i>Bacteroidia</i>    | <i>Bacteroidales</i>                       | <i>Marinifilaceae</i>     | <i>Odoribacter</i>              | 0.035              |
| <i>Firmicutes</i>       | <i>Clostridia</i>     | <i>Lachnospirales</i>                      | <i>Lachnospiraceae</i>    | <i>Agathobacter</i>             | 0.035              |
| <i>Actinobacteriota</i> | <i>Actinobacteria</i> | <i>Bifidobacteriales</i>                   | <i>Bifidobacteriaceae</i> | <i>Bifidobacterium</i>          | 0.033              |
| <i>Firmicutes</i>       | <i>Clostridia</i>     | <i>Oscillospirales</i>                     | <i>Oscillospiraceae</i>   | <i>Oscillibacter</i>            | 0.031              |
| <i>Firmicutes</i>       | <i>Clostridia</i>     | <i>Oscillospirales</i>                     | <i>Ruminococcaceae</i>    | <i>Subdoligranulum</i>          | 0.030              |
| <i>Fusobacteriota</i>   | <i>Fusobacteriia</i>  | <i>Fusobacteriales</i>                     | <i>Fusobacteriaceae</i>   | <i>Fusobacterium</i>            | 0.029              |

|                     |                      |                                            |                              |                                    |       |
|---------------------|----------------------|--------------------------------------------|------------------------------|------------------------------------|-------|
| <i>Firmicutes</i>   | <i>Negativicutes</i> | <i>Acidaminococcales</i>                   | <i>Acidaminococcaceae</i>    | <i>Phascolarctobacterium</i>       | 0.029 |
| <i>Firmicutes</i>   | <i>Clostridia</i>    | <i>Oscillospirales</i>                     | <i>Oscillospiraceae</i>      | <i>Flavonifractor</i>              | 0.029 |
| <i>Firmicutes</i>   | <i>Clostridia</i>    | <i>Lachnospirales</i>                      | <i>Lachnospiraceae</i>       | <i>[Eubacterium]_eligens_group</i> | 0.027 |
| <i>Bacteroidota</i> | <i>Bacteroidia</i>   | <i>Bacteroidales</i>                       | <i>Rikenellaceae</i>         | <i>Alistipes</i>                   | 0.027 |
| <i>Firmicutes</i>   | <i>Clostridia</i>    | <i>Oscillospirales</i>                     | <i>Ruminococcaceae</i>       | <i>Incertae_sedis</i>              | 0.026 |
| <i>Firmicutes</i>   | <i>Clostridia</i>    | <i>Peptostreptococcales-Tissierellales</i> | <i>Peptostreptococcaceae</i> | <i>Intestinibacter</i>             | 0.026 |

---

Genera that were significantly changed in PD compared to controls are underlined (see Supplementary Table 3a).

**Supplementary Table 6. Top ten genera that differentiated DLB and HY3&4 (both PDD- and PDD+) in random forest modeling**

| Rank | Genus                         | AUROC |
|------|-------------------------------|-------|
| 1    | <i>Ruminococcus torques</i> * | 0.738 |
| 2    | <i>Bifidobacterium</i>        | 0.727 |
| 3    | <i>Collinsella</i> *          | 0.825 |
| 4    | <i>Blautia</i>                | 0.823 |
| 5    | <i>Bacteroides</i>            | 0.807 |
| 6    | <i>Ruminococcus gnavus</i> *  | 0.801 |
| 7    | <i>Intestinibacter</i>        | 0.791 |
| 8    | <i>Eubacterium hallii</i>     | 0.788 |
| 9    | <i>Erysipelatoclostridium</i> | 0.786 |
| 10   | <i>Tyzzrella</i>              | 0.776 |

Area under the receiver operating characteristics curve (AUROC) by leave-one-out cross validation in recursive feature elimination is indicated. AUROC at the *N*th position was obtained when genera ranked 1st to *N*th were used for random forest modeling. For example, AUROC of 0.825 was obtained by *Ruminococcus torques*, *Bifidobacterium*, and *Collinsella*. AUROC values are plotted in Fig. 3b.

\*Genera that carry 7- $\beta$ -hydroxysteroid dehydrogenase (7BHD) to produce ursodeoxycholic acid.

**Supplementary Table 7a. Comparison of genera between DLB and HY3&4 (both PDD- and PDD+)**

| Phylum                | Class                 | Order                              | Family                            | Genus                               | P-value by ANCOM-BC | Q-value by ANCOM-BC | P-value by Wilcoxon rank sum test | Q-value by Wilcoxon rank sum test | ± <sup>a</sup> |
|-----------------------|-----------------------|------------------------------------|-----------------------------------|-------------------------------------|---------------------|---------------------|-----------------------------------|-----------------------------------|----------------|
| <i>Firmicutes</i>     | <i>Bacilli</i>        | <i>Erysipelotrichales</i>          | <i>Erysipelotrichaceae</i>        | <i>Turicibacter</i>                 | 1.2E-03             | 0.059               | 0.19                              | 0.54                              | -              |
| <i>Actinobacteria</i> | <i>Coriobacteriia</i> | <i>Coriobacteriales</i>            | <i>Coriobacteriaceae</i>          | <i>Collinsella</i>                  | 1.8E-03             | 0.059               | 0.011                             | 0.15                              | +              |
| <i>Firmicutes</i>     | <i>Clostridia</i>     | <i>Lachnospirales</i>              | <i>Lachnospiraceae</i>            | <i>Blautia</i>                      | 1.9E-03             | 0.059               | 3.2E-03                           | 0.15                              | +              |
| <i>Firmicutes</i>     | <i>Clostridia</i>     | <i>Lachnospirales</i>              | <i>Lachnospiraceae</i>            | <i>Ruminococcus torques</i>         | 3.2E-03             | 0.076               | 2.5E-03                           | 0.15                              | +              |
| <i>Bacteroidota</i>   | <i>Bacteroidia</i>    | <i>Bacteroidales</i>               | <i>Marinifilaceae</i>             | <i>Odoribacter</i>                  | 5.3E-03             | 0.10                | 0.032                             | 0.25                              | -              |
| <i>Firmicutes</i>     | <i>Clostridia</i>     | <i>Oscillospirales</i>             | <i>Ruminococcaceae</i>            | <i>Fournierella</i>                 | 8.4E-03             | 0.13                | 8.5E-03                           | 0.15                              | -              |
| <i>Firmicutes</i>     | <i>Clostridia</i>     | <i>Clostridia_vadinB B60_group</i> | <i>Clostridia_vadinBB60_group</i> | <i>Clostridia_vadinBB60_group</i>   | 0.011               | 0.15                | 0.067                             | 0.32                              | -              |
| <i>Firmicutes</i>     | <i>Bacilli</i>        | <i>Lactobacillales</i>             | <i>Lactobacillaceae</i>           | <i>Lactobacillus</i>                | 0.013               | 0.16                | 0.42                              | 0.73                              | -              |
| <i>Firmicutes</i>     | <i>Clostridia</i>     | <i>Oscillospirales</i>             | <i>Ruminococcaceae</i>            | <i>Negativibacillus</i>             | 0.016               | 0.16                | 0.045                             | 0.28                              | -              |
| <i>Firmicutes</i>     | <i>Bacilli</i>        | <i>Bacillales</i>                  | <i>Bacillaceae</i>                | <i>Bacillus</i>                     | 0.020               | 0.19                | 0.052                             | 0.29                              | -              |
| <i>Firmicutes</i>     | <i>Clostridia</i>     | <i>Lachnospirales</i>              | <i>Lachnospiraceae</i>            | <i>[Eubacterium]_eligens_group</i>  | 0.022               | 0.19                | 0.42                              | 0.73                              | -              |
| <i>Firmicutes</i>     | <i>Bacilli</i>        | <i>Erysipelotrichales</i>          | <i>Erysipelotrichaceae</i>        | <i>Faecalitalea</i>                 | 0.034               | 0.26                | 7.1E-03                           | 0.15                              | -              |
| <i>Actinobacteria</i> | <i>Coriobacteriia</i> | <i>Coriobacteriales</i>            | <i>Eggerthellaceae</i>            | <i>Eggerthella</i>                  | 0.040               | 0.26                | 0.036                             | 0.26                              | +              |
| <i>Firmicutes</i>     | <i>Bacilli</i>        | <i>Erysipelotrichales</i>          | <i>Erysipelotrichaceae</i>        | <i>[Clostridium]_innocuum_group</i> | 0.040               | 0.26                | 0.17                              | 0.54                              | +              |
| <i>Firmicutes</i>     | <i>Clostridia</i>     | <i>Oscillospirales</i>             | <i>Oscillospiraceae</i>           | <i>Colidextribacter</i>             | 0.042               | 0.26                | 0.039                             | 0.26                              | -              |
| <i>Bacteroidota</i>   | <i>Bacteroidia</i>    | <i>Bacteroidales</i>               | <i>Barnesiellaceae</i>            | <i>Coproacter</i>                   | 0.049               | 0.29                | 0.13                              | 0.51                              | -              |
| <i>Firmicutes</i>     | <i>Clostridia</i>     | <i>Clostridia_UCG-014</i>          | <i>Clostridia_UCG-014</i>         | <i>Clostridia_UCG-014</i>           | 0.053               | 0.29                | 0.29                              | 0.61                              | -              |
| <i>Firmicutes</i>     | <i>Bacilli</i>        | <i>Erysipelotrichales</i>          | <i>Erysipelatoclostridiaceae</i>  | <i>Erysipelatoclostridium</i>       | 0.060               | 0.30                | 0.28                              | 0.60                              | +              |

|                       |                       |                                     |                           |                                |       |      |         |      |   |
|-----------------------|-----------------------|-------------------------------------|---------------------------|--------------------------------|-------|------|---------|------|---|
| <u>Actinobacteria</u> | <u>Actinobacteria</u> | <u>Bifidobacteriales</u>            | <u>Bifidobacteriaceae</u> | <u>Bifidobacterium</u>         | 0.066 | 0.30 | 7.0E-03 | 0.15 | - |
| Firmicutes            | Clostridia            | Oscillospirales                     | Ruminococcaceae           | UBA1819                        | 0.066 | 0.30 | 0.14    | 0.51 | + |
| Firmicutes            | Clostridia            | Oscillospirales                     | Ruminococcaceae           | Faecalibacterium               | 0.067 | 0.30 | 0.031   | 0.25 | - |
| Firmicutes            | Bacilli               | Erysipelotrichales                  | Erysipelotrichaceae       | Holdemanella                   | 0.073 | 0.31 | 0.019   | 0.19 | + |
| Firmicutes            | Clostridia            | Lachnospirales                      | Lachnospiraceae           | Lachnoclostridium              | 0.077 | 0.31 | 0.26    | 0.58 | + |
| Firmicutes            | Clostridia            | Oscillospirales                     | Ruminococcaceae           | CAG-352                        | 0.083 | 0.32 | 0.56    | 0.79 | - |
| Firmicutes            | Clostridia            | Peptostreptococcales-Tissierellales | Peptostreptococcaceae     | Romboutsia                     | 0.085 | 0.32 | 0.43    | 0.73 | - |
| Firmicutes            | Clostridia            | Oscillospirales                     | Oscillospiraceae          |                                | 0.090 | 0.32 | 0.10    | 0.45 | - |
| Proteobacteria        | Gammaproteobacteria   | Burkholderiales                     | Sutterellaceae            | Parasutterella                 | 0.098 | 0.33 | 0.011   | 0.15 | - |
| Firmicutes            | Clostridia            | Lachnospirales                      | Lachnospiraceae           | [Eubacterium]_ventriosum_group | 0.10  | 0.33 | 0.018   | 0.19 | - |
| Firmicutes            | Clostridia            | Clostridiales                       | Clostridiaceae            | Clostridium_sensu_stricto_1    | 0.11  | 0.36 | 0.83    | 0.89 | - |
| Firmicutes            | Clostridia            | Oscillospirales                     | UCG-010                   | UCG-010                        | 0.11  | 0.36 | 0.19    | 0.54 | - |
| Firmicutes            | Bacilli               | Lactobacillales                     | Enterococcaceae           | Enterococcus                   | 0.12  | 0.36 | 0.13    | 0.51 | - |
| Desulfobacterota      | Desulfovibrionia      | Desulfovibrionales                  | Desulfovibrionaceae       | Bilophila                      | 0.12  | 0.36 | 0.66    | 0.86 | + |
| Bacteroidota          | Bacteroidia           | Bacteroidales                       | Barnesiellaceae           | Barnesiella                    | 0.14  | 0.39 | 0.18    | 0.54 | - |
| Firmicutes            | Clostridia            | Lachnospirales                      | Lachnospiraceae           | Eisenbergiella                 | 0.15  | 0.39 | 0.065   | 0.32 | + |
| Firmicutes            | Clostridia            | Oscillospirales                     | Oscillospiraceae          | uncultured                     | 0.15  | 0.39 | 0.80    | 0.88 | - |
| Firmicutes            | Clostridia            | Lachnospirales                      | Lachnospiraceae           | [Ruminococcus]_gnavus_group    | 0.15  | 0.39 | 0.20    | 0.54 | + |
| Proteobacteria        | Gammaproteobacteria   | Enterobacteriales                   | Enterobacteriaceae        | Klebsiella                     | 0.15  | 0.39 | 0.34    | 0.70 | + |
| Firmicutes            | Clostridia            | Lachnospirales                      | Lachnospiraceae           | Agathobacter                   | 0.17  | 0.41 | 0.25    | 0.58 | - |
| Bacteroidota          | Bacteroidia           | Bacteroidales                       | Rikenellaceae             | Alistipes                      | 0.17  | 0.41 | 0.21    | 0.55 | - |

|                          |                            |                                       |                                              |                                              |      |      |       |      |   |
|--------------------------|----------------------------|---------------------------------------|----------------------------------------------|----------------------------------------------|------|------|-------|------|---|
| <i>Firmicutes</i>        | <i>Clostridia</i>          | <i>Lachnospirales</i>                 | <i>Lachnospiraceae</i>                       | <i>Dorea</i>                                 | 0.18 | 0.41 | 0.57  | 0.79 | + |
| <i>Firmicutes</i>        | <i>Clostridia</i>          | <i>Lachnospirales</i>                 | <i>Lachnospiraceae</i>                       | <i>Tyzzera</i>                               | 0.18 | 0.41 | 0.37  | 0.70 | + |
| <i>Firmicutes</i>        | <i>Clostridia</i>          | <i>Oscillospirales</i>                | <i>Ruminococcaceae</i>                       |                                              | 0.19 | 0.42 | 0.061 | 0.32 | - |
| <i>Firmicutes</i>        | <i>Clostridia</i>          | <i>Oscillospirales</i>                | <i>[Eubacterium]_coprostanoligenes_group</i> | <i>[Eubacterium]_coprostanoligenes_group</i> | 0.20 | 0.45 | 0.75  | 0.88 | - |
| <i>Firmicutes</i>        | <i>Clostridia</i>          | <i>Oscillospirales</i>                | <i>Oscillospiraceae</i>                      | <i>UCG-002</i>                               | 0.25 | 0.51 | 0.23  | 0.56 | - |
| <i>Firmicutes</i>        | <i>Clostridia</i>          | <i>Lachnospirales</i>                 | <i>Lachnospiraceae</i>                       | <i>Lachnospiraceae_ND3007_group</i>          | 0.25 | 0.51 | 0.79  | 0.88 | - |
| <i>Firmicutes</i>        | <i>Bacilli</i>             | <i>Lactobacillales</i>                | <i>Streptococcaceae</i>                      | <i>Lactococcus</i>                           | 0.25 | 0.51 | 0.16  | 0.53 | - |
| <i>Firmicutes</i>        | <i>Clostridia</i>          | <i>Oscillospirales</i>                | <i>Ruminococcaceae</i>                       | <i>Ruminococcus</i>                          | 0.26 | 0.51 | 0.68  | 0.87 | - |
| <i>Firmicutes</i>        | <i>Clostridia</i>          | <i>Lachnospirales</i>                 | <i>Lachnospiraceae</i>                       | <i>Lachnospiraceae_NK4A136_group</i>         | 0.27 | 0.52 | 0.049 | 0.29 | - |
| <i>Firmicutes</i>        | <i>Negativicutes</i>       | <i>Veillonellales-Selenomonadales</i> | <i>Veillonellaceae</i>                       | <i>Megasphaera</i>                           | 0.28 | 0.52 | 0.73  | 0.88 | + |
| <i>Firmicutes</i>        | <i>Bacilli</i>             | <i>Lactobacillales</i>                | <i>Streptococcaceae</i>                      | <i>Streptococcus</i>                         | 0.28 | 0.52 | 0.83  | 0.89 | + |
| <i>Firmicutes</i>        | <i>Clostridia</i>          | <i>Monoglobales</i>                   | <i>Monoglobaceae</i>                         | <i>Monoglobus</i>                            | 0.28 | 0.52 | 0.47  | 0.77 | + |
| <i>Firmicutes</i>        | <i>Clostridia</i>          | <i>Lachnospirales</i>                 | <i>Lachnospiraceae</i>                       | <i>[Ruminococcus]_gavreaii_group</i>         | 0.29 | 0.52 | 0.73  | 0.88 | + |
| <i>Proteobacteria</i>    | <i>Gammaproteobacteria</i> | <i>Enterobacteriales</i>              | <i>Enterobacteriaceae</i>                    |                                              | 0.31 | 0.54 | 0.45  | 0.75 | + |
| <i>Firmicutes</i>        | <i>Negativicutes</i>       | <i>Veillonellales-Selenomonadales</i> | <i>Veillonellaceae</i>                       | <i>Dialister</i>                             | 0.31 | 0.54 | 0.89  | 0.92 | + |
| <i>Firmicutes</i>        | <i>Clostridia</i>          | <i>Oscillospirales</i>                | <i>Ruminococcaceae</i>                       | <i>Subdoligranulum</i>                       | 0.35 | 0.59 | 0.49  | 0.77 | + |
| <i>Proteobacteria</i>    | <i>Gammaproteobacteria</i> | <i>Enterobacteriales</i>              | <i>Enterobacteriaceae</i>                    | <i>Escherichia-Shigella</i>                  | 0.37 | 0.62 | 0.15  | 0.52 | + |
| <i>Verrucomicrobiota</i> | <i>Verrucomicrobiae</i>    | <i>Verrucomicrobiales</i>             | <i>Akkermansiaceae</i>                       | <i>Akkermansia</i>                           | 0.41 | 0.68 | 1.00  | 1.00 | - |
| <i>Proteobacteria</i>    | <i>Gammaproteobacteria</i> | <i>Burkholderiales</i>                | <i>Sutterellaceae</i>                        | <i>Sutterella</i>                            | 0.43 | 0.69 | 0.42  | 0.73 | - |
| <i>Firmicutes</i>        | <i>Clostridia</i>          | <i>Lachnospirales</i>                 | <i>Lachnospiraceae</i>                       |                                              | 0.44 | 0.70 | 0.40  | 0.73 | - |
| <i>Firmicutes</i>        | <i>Clostridia</i>          | <i>Lachnospirales</i>                 | <i>Lachnospiraceae</i>                       | <i>Anaerostipes</i>                          | 0.49 | 0.75 | 0.36  | 0.70 | - |

|                       |                            |                                            |                                  |                                      |      |      |       |      |   |
|-----------------------|----------------------------|--------------------------------------------|----------------------------------|--------------------------------------|------|------|-------|------|---|
| <i>Firmicutes</i>     | <i>Clostridia</i>          | <i>Peptostreptococcales-Tissierellales</i> | <i>Peptostreptococcaceae</i>     | <i>Intestinibacter</i>               | 0.49 | 0.75 | 0.14  | 0.51 | + |
| <i>Firmicutes</i>     | <i>Negativicutes</i>       | <i>Acidaminococcales</i>                   | <i>Acidaminococcaceae</i>        | <i>Phascolarctobacterium</i>         | 0.49 | 0.75 | 0.77  | 0.88 | - |
| <i>Fusobacteriota</i> | <i>Fusobacteriia</i>       | <i>Fusobacteriales</i>                     | <i>Fusobacteriaceae</i>          | <i>Fusobacterium</i>                 | 0.51 | 0.77 | 0.022 | 0.21 | + |
| <i>Firmicutes</i>     | <i>Negativicutes</i>       | <i>Acidaminococcales</i>                   | <i>Acidaminococcaceae</i>        | <i>Acidaminococcus</i>               | 0.55 | 0.80 | 0.45  | 0.75 | - |
| <i>Firmicutes</i>     | <i>Clostridia</i>          | <i>Lachnospirales</i>                      | <i>Lachnospiraceae</i>           | <i>Sellimonas</i>                    | 0.56 | 0.80 | 0.63  | 0.86 | + |
| <i>Bacteroidota</i>   | <i>Bacteroidia</i>         | <i>Bacteroidales</i>                       | <i>Marinifilaceae</i>            | <i>Butyricimonas</i>                 | 0.58 | 0.80 | 0.20  | 0.54 | - |
| <i>Firmicutes</i>     | <i>Clostridia</i>          | <i>Lachnospirales</i>                      | <i>Lachnospiraceae</i>           | <i>Fusicatenibacter</i>              | 0.60 | 0.80 | 0.57  | 0.79 | + |
| <i>Firmicutes</i>     | <i>Clostridia</i>          | <i>Christensenellales</i>                  | <i>Christensenellaceae</i>       | <i>Christensenellaceae_R-7_group</i> | 0.60 | 0.80 | 0.66  | 0.86 | - |
| <i>Firmicutes</i>     | <i>Clostridia</i>          | <i>Eubacteriales</i>                       | <i>Eubacteriaceae</i>            | <i>Eubacterium</i>                   | 0.60 | 0.80 | 0.36  | 0.70 | + |
| <i>Proteobacteria</i> | <i>Gammaproteobacteria</i> | <i>Enterobacterales</i>                    | <i>Enterobacteriaceae</i>        | <i>Enterobacter</i>                  | 0.60 | 0.80 | 0.19  | 0.54 | - |
| <i>Firmicutes</i>     | <i>Clostridia</i>          | <i>Lachnospirales</i>                      | <i>Lachnospiraceae</i>           | <i>Lachnospira</i>                   | 0.62 | 0.80 | 0.86  | 0.91 | + |
| <i>Firmicutes</i>     | <i>Bacilli</i>             | <i>Erysipelotrichales</i>                  | <i>Erysipelatoclostridiaceae</i> | <i>Erysipelotrichaceae_UCG-003</i>   | 0.62 | 0.80 | 0.55  | 0.79 | + |
| <i>Bacteroidota</i>   | <i>Bacteroidia</i>         | <i>Bacteroidales</i>                       | <i>Muribaculaceae</i>            | <i>Muribaculaceae</i>                | 0.62 | 0.80 | 0.36  | 0.70 | + |
| <i>Firmicutes</i>     | <i>Clostridia</i>          | <i>Oscillospirales</i>                     | <i>Butyricoccaceae</i>           | <i>Butyricoccus</i>                  | 0.65 | 0.81 | 0.54  | 0.79 | - |
| <i>Firmicutes</i>     | <i>Clostridia</i>          | <i>Lachnospirales</i>                      | <i>Lachnospiraceae</i>           | <i>Coproccoccus</i>                  | 0.65 | 0.81 | 0.50  | 0.77 | + |
| <i>Firmicutes</i>     | <i>Clostridia</i>          | <i>Lachnospirales</i>                      | <i>Lachnospiraceae</i>           | <i>Roseburia</i>                     | 0.67 | 0.83 | 0.49  | 0.77 | + |
| <i>Firmicutes</i>     | <i>Clostridia</i>          | <i>Lachnospirales</i>                      | <i>Lachnospiraceae</i>           | <i>uncultured</i>                    | 0.68 | 0.83 | 0.20  | 0.54 | - |
| <i>Firmicutes</i>     | <i>Clostridia</i>          | <i>Lachnospirales</i>                      | <i>Lachnospiraceae</i>           | <i>Marvinbryantia</i>                | 0.69 | 0.83 | 0.56  | 0.79 | + |
| <i>Firmicutes</i>     | <i>Clostridia</i>          | <i>Oscillospirales</i>                     | <i>Oscillospiraceae</i>          | <i>UCG-005</i>                       | 0.70 | 0.84 | 0.80  | 0.88 | + |
| <i>Firmicutes</i>     | <i>Clostridia</i>          | <i>Oscillospirales</i>                     | <i>Oscillospiraceae</i>          | <i>NK4A214_group</i>                 | 0.72 | 0.85 | 0.69  | 0.87 | - |
| <i>Firmicutes</i>     | <i>Clostridia</i>          | <i>Oscillospirales</i>                     | <i>Oscillospiraceae</i>          | <i>Oscillibacter</i>                 | 0.77 | 0.89 | 0.34  | 0.70 | - |



|                      |                        |                                            |                              |                                   |      |      |       |      |   |
|----------------------|------------------------|--------------------------------------------|------------------------------|-----------------------------------|------|------|-------|------|---|
| <i>Firmicutes</i>    | <i>Clostridia</i>      | <i>Oscillospirales</i>                     | <i>Ruminococcaceae</i>       | <i>Incertae</i>                   | 0.78 | 0.89 | 0.50  | 0.77 | + |
| <i>Bacteroidota</i>  | <i>Bacteroidia</i>     | <i>Bacteroidales</i>                       | <i>Prevotellaceae</i>        | <i>Prevotella</i>                 | 0.78 | 0.89 | 0.66  | 0.86 | - |
| <i>Firmicutes</i>    | <i>Clostridia</i>      | <i>Lachnospirales</i>                      | <i>Lachnospiraceae</i>       | <i>[Eubacterium]_hallii_group</i> | 0.82 | 0.91 | 0.092 | 0.41 | + |
| <i>Bacteroidota</i>  | <i>Bacteroidia</i>     | <i>Bacteroidales</i>                       | <i>Bacteroidaceae</i>        | <i>Bacteroides</i>                | 0.83 | 0.91 | 0.79  | 0.88 | + |
| <i>Firmicutes</i>    | <i>Clostridia</i>      | <i>Oscillospirales</i>                     | <i>Ruminococcaceae</i>       | <i>uncultured</i>                 | 0.84 | 0.91 | 0.80  | 0.88 | + |
| <i>Bacteroidota</i>  | <i>Bacteroidia</i>     | <i>Bacteroidales</i>                       | <i>Tannerellaceae</i>        | <i>Parabacteroides</i>            | 0.85 | 0.92 | 0.69  | 0.87 | + |
| <i>Euryarchaeota</i> | <i>Methanobacteria</i> | <i>Methanobacteriales</i>                  | <i>Methanobacteriaceae</i>   | <i>Methanobrevibacter</i>         | 0.86 | 0.92 | 1.00  | 1.00 | - |
| <i>Firmicutes</i>    | <i>Clostridia</i>      | <i>Oscillospirales</i>                     | <i>Oscillospiraceae</i>      | <i>Flavonifractor</i>             | 0.87 | 0.92 | 0.94  | 0.96 | + |
| <i>Bacteroidota</i>  | <i>Bacteroidia</i>     | <i>Bacteroidales</i>                       | <i>Tannerellaceae</i>        |                                   | 0.88 | 0.92 | 0.25  | 0.58 | - |
| <i>Bacteroidota</i>  | <i>Bacteroidia</i>     | <i>Bacteroidales</i>                       | <i>Prevotellaceae</i>        | <i>Paraprevotella</i>             | 0.90 | 0.92 | 0.76  | 0.88 | + |
| <i>Firmicutes</i>    | <i>Clostridia</i>      | <i>Peptostreptococcales-Tissierellales</i> | <i>Anaerovoracaceae</i>      | <i>Family_XIII_AD3011_group</i>   | 0.94 | 0.96 | 0.92  | 0.96 | + |
| <i>Firmicutes</i>    | <i>Negativicutes</i>   | <i>Veillonellales-Selenomonadales</i>      | <i>Veillonellaceae</i>       | <i>Veillonella</i>                | 0.99 | 1.00 | 0.23  | 0.56 | - |
| <i>Firmicutes</i>    | <i>Clostridia</i>      | <i>Peptostreptococcales-Tissierellales</i> | <i>Peptostreptococcaceae</i> | <i>Terrisporobacter</i>           | 1.00 | 1.00 | 0.79  | 0.88 | + |

<sup>a</sup>Increased and decreased genera in DLB compared to HY3&4 are indicated by + and -, respectively.

Three genera that made the maximum AUROC by leave-one-out cross validation in recursive feature elimination are underlined.

**Supplementary Table 7b. Comparison of genera between DLB and PDD+ at any HY stages**

| Phylum                  | Class                      | Order                                      | Family                                       | Genus                                        | P-value by ANCOM-BC | Q-value by ANCOM-BC | P-value by Wilcoxon rank sum test | Q-value by Wilcoxon rank sum test | ± <sup>a</sup> |
|-------------------------|----------------------------|--------------------------------------------|----------------------------------------------|----------------------------------------------|---------------------|---------------------|-----------------------------------|-----------------------------------|----------------|
| <i>Actinobacteriota</i> | <i>Coriobacteriia</i>      | <i>Coriobacteriales</i>                    | <i>Coriobacteriaceae</i>                     | <i>Collinsella</i>                           | 4.9E-04             | 0.044*              | 0.024                             | 0.36                              | +              |
| <i>Firmicutes</i>       | <i>Clostridia</i>          | <i>Lachnospirales</i>                      | <i>Lachnospiraceae</i>                       | <i>Blautia</i>                               | 6.6E-03             | 0.24                | 0.088                             | 0.61                              | +              |
| <i>Bacteroidota</i>     | <i>Bacteroidia</i>         | <i>Bacteroidales</i>                       | <i>Marinifilaceae</i>                        | <i>Odoribacter</i>                           | 0.013               | 0.24                | 7.1E-03                           | 0.21                              | -              |
| <i>Firmicutes</i>       | <i>Bacilli</i>             | <i>Erysipelotrichales</i>                  | <i>Erysipelotrichaceae</i>                   | <i>Turicibacter</i>                          | 0.013               | 0.24                | 0.10                              | 0.64                              | -              |
| <i>Firmicutes</i>       | <i>Clostridia</i>          | <i>Oscillospirales</i>                     | <i>Oscillospiraceae</i>                      | <i>Colidextribacter</i>                      | 0.013               | 0.24                | 6.9E-03                           | 0.21                              | -              |
| <i>Firmicutes</i>       | <i>Clostridia</i>          | <i>Lachnospirales</i>                      | <i>Lachnospiraceae</i>                       | <i>[Eubacterium]_eligen_s_group</i>          | 0.029               | 0.41                | 0.13                              | 0.67                              | -              |
| <i>Proteobacteria</i>   | <i>Gammaproteobacteria</i> | <i>Enterobacteriales</i>                   | <i>Enterobacteriaceae</i>                    | <i>Citrobacter</i>                           | 0.036               | 0.41                | 1.4E-03                           | 0.12                              | -              |
| <i>Firmicutes</i>       | <i>Clostridia</i>          | <i>Clostridiales</i>                       | <i>Clostridiaceae</i>                        | <i>Clostridium_sensu_stricto_1</i>           | 0.037               | 0.41                | 0.29                              | 0.78                              | -              |
| <i>Firmicutes</i>       | <i>Clostridia</i>          | <i>Lachnospirales</i>                      | <i>Lachnospiraceae</i>                       | <i>Lachnoclostridium</i>                     | 0.043               | 0.41                | 0.43                              | 0.87                              | +              |
| <i>Firmicutes</i>       | <i>Bacilli</i>             | <i>Erysipelotrichales</i>                  | <i>Erysipelotrichaceae</i>                   | <i>[Clostridium]_innocuum_group</i>          | 0.050               | 0.41                | 0.29                              | 0.78                              | +              |
| <i>Firmicutes</i>       | <i>Clostridia</i>          | <i>Clostridia_vadinBB60_group</i>          | <i>Clostridia_vadinBB60_group</i>            | <i>Clostridia_vadinBB60_group</i>            | 0.054               | 0.41                | 0.067                             | 0.55                              | -              |
| <i>Bacteroidota</i>     | <i>Bacteroidia</i>         | <i>Bacteroidales</i>                       | <i>Rikenellaceae</i>                         | <i>Alistipes</i>                             | 0.057               | 0.41                | 0.033                             | 0.42                              | -              |
| <i>Proteobacteria</i>   | <i>Gammaproteobacteria</i> | <i>Enterobacteriales</i>                   | <i>Enterobacteriaceae</i>                    | <i>Klebsiella</i>                            | 0.059               | 0.41                | 0.92                              | 0.99                              | +              |
| <i>Firmicutes</i>       | <i>Clostridia</i>          | <i>Lachnospirales</i>                      | <i>Lachnospiraceae</i>                       | <i>[Ruminococcus]_torques_group</i>          | 0.067               | 0.41                | 0.057                             | 0.51                              | +              |
| <i>Firmicutes</i>       | <i>Clostridia</i>          | <i>Peptostreptococcales-Tissierellales</i> | <i>Peptostreptococcaceae</i>                 | <i>Romboutsia</i>                            | 0.070               | 0.41                | 0.48                              | 0.87                              | -              |
| <i>Firmicutes</i>       | <i>Clostridia</i>          | <i>Lachnospirales</i>                      | <i>Lachnospiraceae</i>                       | <i>Eisenbergiella</i>                        | 0.072               | 0.41                | 0.078                             | 0.59                              | +              |
| <i>Firmicutes</i>       | <i>Clostridia</i>          | <i>Oscillospirales</i>                     | <i>[Eubacterium]_coprostanoligenes_group</i> | <i>[Eubacterium]_coprostanoligenes_group</i> | 0.082               | 0.41                | 0.25                              | 0.78                              | -              |

|                         |                         |                                       |                                  |                                       |       |      |       |      |   |
|-------------------------|-------------------------|---------------------------------------|----------------------------------|---------------------------------------|-------|------|-------|------|---|
| <i>Firmicutes</i>       | <i>Bacilli</i>          | <i>Erysipelotrichales</i>             | <i>Erysipelotrichaceae</i>       | <i>Faecalitalea</i>                   | 0.082 | 0.41 | 0.021 | 0.36 | - |
| <i>Firmicutes</i>       | <i>Bacilli</i>          | <i>Erysipelotrichales</i>             | <i>Erysipelatoclostridiaceae</i> | <i>Erysipelatoclostridium</i>         | 0.091 | 0.41 | 0.92  | 0.99 | + |
| <i>Firmicutes</i>       | <i>Bacilli</i>          | <i>Erysipelotrichales</i>             | <i>Erysipelotrichaceae</i>       | <i>Holdemanella</i>                   | 0.092 | 0.41 | 0.11  | 0.64 | + |
| <i>Firmicutes</i>       | <i>Clostridia</i>       | <i>Oscillospirales</i>                | <i>Oscillospiraceae</i>          |                                       | 0.098 | 0.42 | 0.016 | 0.35 | - |
| <i>Firmicutes</i>       | <i>Clostridia</i>       | <i>Lachnospirales</i>                 | <i>Lachnospiraceae</i>           | <i>Dorea</i>                          | 0.10  | 0.42 | 0.84  | 0.99 | + |
| <i>Firmicutes</i>       | <i>Clostridia</i>       | <i>Christensenellales</i>             | <i>Christensenellaceae</i>       | <i>Christensenellaceae_R-7_group</i>  | 0.12  | 0.47 | 0.29  | 0.78 | - |
| <i>Firmicutes</i>       | <i>Clostridia</i>       | <i>Oscillospirales</i>                | <i>UCG-010</i>                   | <i>UCG-010</i>                        | 0.13  | 0.48 | 0.17  | 0.67 | - |
| <i>Firmicutes</i>       | <i>Clostridia</i>       | <i>Monoglobales</i>                   | <i>Monoglobaceae</i>             | <i>Monoglobus</i>                     | 0.14  | 0.50 | 0.87  | 0.99 | + |
| <i>Bacteroidota</i>     | <i>Bacteroidia</i>      | <i>Bacteroidales</i>                  | <i>Barnesiellaceae</i>           | <i>Copro bacter</i>                   | 0.17  | 0.57 | 0.17  | 0.67 | - |
| <i>Firmicutes</i>       | <i>Clostridia</i>       | <i>Lachnospirales</i>                 | <i>Lachnospiraceae</i>           | <i>[Eubacterium]_ventriosum_group</i> | 0.17  | 0.57 | 0.051 | 0.51 | - |
| <i>Firmicutes</i>       | <i>Bacilli</i>          | <i>Lactobacillales</i>                | <i>Lactobacillaceae</i>          | <i>Lactobacillus</i>                  | 0.18  | 0.57 | 0.56  | 0.87 | - |
| <i>Actinobacteriota</i> | <i>Coriobacteriia</i>   | <i>Coriobacteriales</i>               | <i>Eggerthellaceae</i>           | <i>Eggerthella</i>                    | 0.18  | 0.57 | 0.12  | 0.67 | + |
| <i>Firmicutes</i>       | <i>Clostridia</i>       | <i>Eubacteriales</i>                  | <i>Eubacteriaceae</i>            | <i>Eubacterium</i>                    | 0.20  | 0.60 | 0.82  | 0.99 | + |
| <i>Firmicutes</i>       | <i>Clostridia</i>       | <i>Oscillospirales</i>                | <i>Ruminococcaceae</i>           | <i>UBA1819</i>                        | 0.21  | 0.60 | 0.61  | 0.89 | + |
| <i>Firmicutes</i>       | <i>Clostridia</i>       | <i>Lachnospirales</i>                 | <i>Lachnospiraceae</i>           | <i>Anaerostipes</i>                   | 0.21  | 0.60 | 0.34  | 0.79 | + |
| <i>Firmicutes</i>       | <i>Clostridia</i>       | <i>Lachnospirales</i>                 | <i>Lachnospiraceae</i>           | <i>Agathobacter</i>                   | 0.22  | 0.60 | 0.56  | 0.87 | - |
| <i>Firmicutes</i>       | <i>Negativicutes</i>    | <i>Veillonellales-Selenomonadales</i> | <i>Veillonellaceae</i>           | <i>Veillonella</i>                    | 0.24  | 0.60 | 0.90  | 0.99 | + |
| <i>Firmicutes</i>       | <i>Clostridia</i>       | <i>Oscillospirales</i>                | <i>Ruminococcaceae</i>           | <i>Faecalibacterium</i>               | 0.24  | 0.60 | 0.14  | 0.67 | - |
| <i>Firmicutes</i>       | <i>Clostridia</i>       | <i>Clostridia_UCG-014</i>             | <i>Clostridia_UCG-014</i>        | <i>Clostridia_UCG-014</i>             | 0.24  | 0.60 | 0.30  | 0.78 | - |
| <i>Firmicutes</i>       | <i>Negativicutes</i>    | <i>Acidaminococcales</i>              | <i>Acidaminococcaceae</i>        | <i>Phascolarctobacterium</i>          | 0.25  | 0.60 | 0.28  | 0.78 | - |
| <i>Desulfobacterota</i> | <i>Desulfovibrionia</i> | <i>Desulfovibrionales</i>             | <i>Desulfovibrionaceae</i>       | <i>Bilophila</i>                      | 0.29  | 0.65 | 0.39  | 0.85 | + |

|                          |                            |                           |                            |                                      |      |      |       |      |   |
|--------------------------|----------------------------|---------------------------|----------------------------|--------------------------------------|------|------|-------|------|---|
| <i>Firmicutes</i>        | <i>Clostridia</i>          | <i>Lachnospirales</i>     | <i>Lachnospiraceae</i>     | <i>Lachnospiraceae_ND3007_group</i>  | 0.30 | 0.65 | 0.60  | 0.89 | - |
| <i>Proteobacteria</i>    | <i>Gammaproteobacteria</i> | <i>Enterobacteriales</i>  | <i>Enterobacteriaceae</i>  | <i>Enterobacter</i>                  | 0.31 | 0.65 | 0.85  | 0.99 | - |
| <i>Firmicutes</i>        | <i>Clostridia</i>          | <i>Lachnospirales</i>     | <i>Lachnospiraceae</i>     | <i>NK4A136_group</i>                 | 0.31 | 0.65 | 0.31  | 0.78 | - |
| <i>Verrucomicrobiota</i> | <i>Verrucomicrobiae</i>    | <i>Verrucomicrobiales</i> | <i>Akkermansiaceae</i>     | <i>Akkermansia</i>                   | 0.31 | 0.65 | 0.91  | 0.99 | - |
| <i>Firmicutes</i>        | <i>Clostridia</i>          | <i>Oscillospirales</i>    | <i>Oscillospiraceae</i>    | <i>Lachnospiraceae_NK4A136_group</i> | 0.31 | 0.65 | 0.17  | 0.67 | - |
| <i>Firmicutes</i>        | <i>Clostridia</i>          | <i>Lachnospirales</i>     | <i>Lachnospiraceae</i>     | <i>Fusicatenibacter</i>              | 0.32 | 0.65 | 0.96  | 0.99 | + |
| <i>Bacteroidota</i>      | <i>Bacteroidia</i>         | <i>Bacteroidales</i>      | <i>Tannerellaceae</i>      | <i>Parabacteroides</i>               | 0.32 | 0.65 | 0.52  | 0.87 | + |
| <i>Firmicutes</i>        | <i>Clostridia</i>          | <i>Lachnospirales</i>     | <i>Lachnospiraceae</i>     |                                      | 0.35 | 0.65 | 0.37  | 0.84 | - |
| <i>Actinobacteriota</i>  | <i>Actinobacteria</i>      | <i>Actinomycetales</i>    | <i>Actinomycetaceae</i>    | <i>Actinomyces</i>                   | 0.35 | 0.65 | 0.045 | 0.51 | + |
| <i>Bacteroidota</i>      | <i>Bacteroidia</i>         | <i>Bacteroidales</i>      | <i>Muribaculaceae</i>      | <i>Muribaculaceae</i>                | 0.36 | 0.65 | 0.60  | 0.89 | + |
| <i>Firmicutes</i>        | <i>Clostridia</i>          | <i>Oscillospirales</i>    | <i>Ruminococcaceae</i>     | <i>Ruminococcus</i>                  | 0.36 | 0.65 | 0.54  | 0.87 | - |
| <i>Bacteroidota</i>      | <i>Bacteroidia</i>         | <i>Bacteroidales</i>      | <i>Tannerellaceae</i>      |                                      | 0.37 | 0.65 | 0.32  | 0.78 | - |
| <i>Bacteroidota</i>      | <i>Bacteroidia</i>         | <i>Bacteroidales</i>      | <i>Barnesiellaceae</i>     | <i>Barnesiella</i>                   | 0.37 | 0.65 | 0.32  | 0.78 | - |
| <i>Firmicutes</i>        | <i>Clostridia</i>          | <i>Lachnospirales</i>     | <i>Lachnospiraceae</i>     | <i>[Ruminococcus]_gavreaii_group</i> | 0.38 | 0.66 | 0.56  | 0.87 | + |
| <i>Firmicutes</i>        | <i>Clostridia</i>          | <i>Oscillospirales</i>    | <i>Ruminococcaceae</i>     | <i>uncultured</i>                    | 0.40 | 0.67 | 0.54  | 0.87 | + |
| <i>Proteobacteria</i>    | <i>Gammaproteobacteria</i> | <i>Enterobacteriales</i>  | <i>Enterobacteriaceae</i>  |                                      | 0.43 | 0.71 | 0.25  | 0.78 | + |
| <i>Firmicutes</i>        | <i>Clostridia</i>          | <i>Oscillospirales</i>    | <i>Ruminococcaceae</i>     | <i>CAG-352</i>                       | 0.44 | 0.71 | 0.65  | 0.91 | - |
| <i>Firmicutes</i>        | <i>Clostridia</i>          | <i>Lachnospirales</i>     | <i>Lachnospiraceae</i>     | <i>uncultured</i>                    | 0.44 | 0.71 | 0.14  | 0.67 | - |
| <i>Firmicutes</i>        | <i>Clostridia</i>          | <i>Oscillospirales</i>    | <i>Oscillospiraceae</i>    | <i>uncultured</i>                    | 0.47 | 0.73 | 0.87  | 0.99 | - |
| <i>Euryarchaeota</i>     | <i>Methanobacteria</i>     | <i>Methanobacteriales</i> | <i>Methanobacteriaceae</i> | <i>Methanobrevibacter</i>            | 0.47 | 0.73 | 0.53  | 0.87 | - |
| <i>Firmicutes</i>        | <i>Bacilli</i>             | <i>Lactobacillales</i>    | <i>Streptococcaceae</i>    | <i>Streptococcus</i>                 | 0.48 | 0.73 | 0.92  | 0.99 | + |

|                       |                            |                                            |                                  |                                    |      |      |      |      |   |
|-----------------------|----------------------------|--------------------------------------------|----------------------------------|------------------------------------|------|------|------|------|---|
| <i>Firmicutes</i>     | <i>Bacilli</i>             | <i>Lactobacillales</i>                     | <i>Enterococcaceae</i>           | <i>Enterococcus</i>                | 0.50 | 0.74 | 0.53 | 0.87 | - |
| <i>Firmicutes</i>     | <i>Clostridia</i>          | <i>Lachnospirales</i>                      | <i>Lachnospiraceae</i>           | <i>Coprococcus</i>                 | 0.51 | 0.76 | 0.84 | 0.99 | + |
| <i>Firmicutes</i>     | <i>Clostridia</i>          | <i>Oscillospirales</i>                     | <i>Oscillospiraceae</i>          | <i>Oscillibacter</i>               | 0.54 | 0.79 | 0.22 | 0.78 | - |
| <i>Firmicutes</i>     | <i>Clostridia</i>          | <i>Lachnospirales</i>                      | <i>Lachnospiraceae</i>           | <i>Tyzzarella</i>                  | 0.55 | 0.79 | 0.75 | 0.94 | + |
| <i>Bacteroidota</i>   | <i>Bacteroidia</i>         | <i>Bacteroidales</i>                       | <i>Prevotellaceae</i>            | <i>Prevotella</i>                  | 0.59 | 0.79 | 0.33 | 0.78 | + |
| <i>Firmicutes</i>     | <i>Clostridia</i>          | <i>Oscillospirales</i>                     | <i>Oscillospiraceae</i>          | <i>UCG-002</i>                     | 0.60 | 0.79 | 0.65 | 0.91 | - |
| <i>Firmicutes</i>     | <i>Clostridia</i>          | <i>Lachnospirales</i>                      | <i>Lachnospiraceae</i>           | <i>[Eubacterium]_hallii_group</i>  | 0.60 | 0.79 | 0.26 | 0.78 | + |
| <i>Fusobacteriota</i> | <i>Fusobacteriia</i>       | <i>Fusobacteriales</i>                     | <i>Fusobacteriaceae</i>          | <i>Fusobacterium</i>               | 0.60 | 0.79 | 0.29 | 0.78 | - |
| <i>Firmicutes</i>     | <i>Clostridia</i>          | <i>Oscillospirales</i>                     | <i>Oscillospiraceae</i>          | <i>UCG-005</i>                     | 0.60 | 0.79 | 0.72 | 0.94 | + |
| <i>Firmicutes</i>     | <i>Bacilli</i>             | <i>Erysipelotrichales</i>                  | <i>Erysipelatoclostridiaceae</i> | <i>Erysipelotrichaceae_UCG-003</i> | 0.61 | 0.79 | 0.46 | 0.87 | - |
| <i>Firmicutes</i>     | <i>Clostridia</i>          | <i>Peptostreptococcales-Tissierellales</i> | <i>Peptostreptococcaceae</i>     | <i>Terrisporobacter</i>            | 0.62 | 0.80 | 0.98 | 0.99 | + |
| <i>Firmicutes</i>     | <i>Clostridia</i>          | <i>Oscillospirales</i>                     | <i>Ruminococcaceae</i>           | <i>[Eubacterium]_siraeum_group</i> | 0.63 | 0.80 | 0.69 | 0.92 | - |
| <i>Firmicutes</i>     | <i>Clostridia</i>          | <i>Oscillospirales</i>                     | <i>Oscillospiraceae</i>          | <i>Flavonifractor</i>              | 0.68 | 0.84 | 0.66 | 0.91 | - |
| <i>Firmicutes</i>     | <i>Clostridia</i>          | <i>Lachnospirales</i>                      | <i>Lachnospiraceae</i>           | <i>Sellimonas</i>                  | 0.68 | 0.84 | 0.68 | 0.91 | + |
| <i>Firmicutes</i>     | <i>Negativicutes</i>       | <i>Veillonellales-Selenomonadales</i>      | <i>Selenomonadaceae</i>          | <i>Megamonas</i>                   | 0.71 | 0.85 | 0.74 | 0.94 | + |
| <i>Proteobacteria</i> | <i>Gammaproteobacteria</i> | <i>Burkholderiales</i>                     | <i>Sutterellaceae</i>            | <i>Sutterella</i>                  | 0.72 | 0.85 | 0.99 | 0.99 | + |
| <i>Firmicutes</i>     | <i>Clostridia</i>          | <i>Lachnospirales</i>                      | <i>Lachnospiraceae</i>           | <i>Roseburia</i>                   | 0.72 | 0.85 | 0.46 | 0.87 | + |
| <i>Firmicutes</i>     | <i>Clostridia</i>          | <i>Oscillospirales</i>                     | <i>Butyricoccaceae</i>           | <i>Butyricoccus</i>                | 0.73 | 0.86 | 0.42 | 0.87 | - |
| <i>Firmicutes</i>     | <i>Clostridia</i>          | <i>Peptostreptococcales-Tissierellales</i> | <i>Anaerovoracaceae</i>          | <i>Family_XIII_AD3011_group</i>    | 0.76 | 0.87 | 0.64 | 0.91 | + |
| <i>Firmicutes</i>     | <i>Clostridia</i>          | <i>Oscillospirales</i>                     | <i>Ruminococcaceae</i>           | <i>Subdoligranulum</i>             | 0.77 | 0.87 | 0.68 | 0.91 | + |

|                         |                            |                                            |                              |                                    |      |      |      |      |   |
|-------------------------|----------------------------|--------------------------------------------|------------------------------|------------------------------------|------|------|------|------|---|
| <i>Bacteroidota</i>     | <i>Bacteroidia</i>         | <i>Bacteroidales</i>                       | <i>Marinifilaceae</i>        | <i>Butyricimonas</i>               | 0.78 | 0.88 | 0.50 | 0.87 | + |
| <i>Firmicutes</i>       | <i>Clostridia</i>          | <i>Oscillospirales</i>                     | <i>Ruminococcaceae</i>       | <i>Incertae_Sedis</i>              | 0.80 | 0.88 | 0.41 | 0.87 | + |
| <i>Firmicutes</i>       | <i>Clostridia</i>          | <i>Lachnospirales</i>                      | <i>Lachnospiraceae</i>       | <i>Lachnospira</i>                 | 0.80 | 0.88 | 0.49 | 0.87 | - |
| <i>Firmicutes</i>       | <i>Clostridia</i>          | <i>Lachnospirales</i>                      | <i>Lachnospiraceae</i>       | <i>[Ruminococcus]_gnavus_group</i> | 0.83 | 0.90 | 0.99 | 0.99 | + |
| <i>Firmicutes</i>       | <i>Clostridia</i>          | <i>Peptostreptococcales-Tissierellales</i> | <i>Peptostreptococcaceae</i> | <i>Intestinibacter</i>             | 0.87 | 0.92 | 0.74 | 0.94 | - |
| <i>Bacteroidota</i>     | <i>Bacteroidia</i>         | <i>Bacteroidales</i>                       | <i>Prevotellaceae</i>        | <i>Paraprevotella</i>              | 0.87 | 0.92 | 0.98 | 0.99 | - |
| <i>Actinobacteriota</i> | <i>Actinobacteria</i>      | <i>Bifidobacteriales</i>                   | <i>Bifidobacteriaceae</i>    | <i>Bifidobacterium</i>             | 0.88 | 0.92 | 0.78 | 0.96 | - |
| <i>Proteobacteria</i>   | <i>Gammaproteobacteria</i> | <i>Enterobacteriales</i>                   | <i>Enterobacteriaceae</i>    | <i>Escherichia-Shigella</i>        | 0.89 | 0.92 | 0.28 | 0.78 | + |
| <i>Firmicutes</i>       | <i>Clostridia</i>          | <i>Oscillospirales</i>                     | <i>Ruminococcaceae</i>       |                                    | 0.94 | 0.96 | 0.52 | 0.87 | - |
| <i>Firmicutes</i>       | <i>Clostridia</i>          | <i>Christensenellales</i>                  | <i>Christensenellaceae</i>   | <i>uncultured</i>                  | 0.99 | 1.00 | 0.16 | 0.67 | + |
| <i>Bacteroidota</i>     | <i>Bacteroidia</i>         | <i>Bacteroidales</i>                       | <i>Bacteroidaceae</i>        | <i>Bacteroides</i>                 | 1.00 | 1.00 | 0.96 | 0.99 | + |

<sup>a</sup>Increased and decreased genera in DLB compared to PDD+ are indicated by + and -, respectively.

**Supplementary Table 8. Correlation analysis between five clinical features and ten genera that were significantly changed in DLB compared to controls.**

| Phylum                  | Class                      | Order                   | Family                   | Genus                               | Clinical feature | Spearman's correlation coefficient | P-value | Q-value |
|-------------------------|----------------------------|-------------------------|--------------------------|-------------------------------------|------------------|------------------------------------|---------|---------|
| <i>Firmicutes</i>       | <i>Clostridia</i>          | <i>Oscillospirales</i>  | <i>Butyricocccaceae</i>  | <i>Butyricococcus</i>               | Age              | -0.32                              | 0.10    | 0.74    |
| <i>Firmicutes</i>       | <i>Clostridia</i>          | <i>Lachnospirales</i>   | <i>Lachnospiraceae</i>   | <i>Ruminococcus torques</i>         | Age              | -0.25                              | 0.20    | 0.74    |
| <i>Actinobacteriota</i> | <i>Coriobacteriia</i>      | <i>Coriobacteriales</i> | <i>Eggerthellaceae</i>   | <i>Eggerthella</i>                  | Age              | 0.18                               | 0.36    | 0.74    |
| <i>Firmicutes</i>       | <i>Clostridia</i>          | <i>Lachnospirales</i>   | <i>Lachnospiraceae</i>   | <i>Lachnospiraceae_ND3007_group</i> | Age              | 0.17                               | 0.39    | 0.74    |
| <i>Actinobacteriota</i> | <i>Coriobacteriia</i>      | <i>Coriobacteriales</i> | <i>Coriobacteriaceae</i> | <i>Collinsella</i>                  | Age              | -0.16                              | 0.42    | 0.74    |
| <i>Proteobacteria</i>   | <i>Gammaproteobacteria</i> | <i>Pasteurellales</i>   | <i>Pasteurellaceae</i>   | <i>Haemophilus</i>                  | Age              | 0.14                               | 0.48    | 0.74    |
| <i>Firmicutes</i>       | <i>Clostridia</i>          | <i>Lachnospirales</i>   | <i>Lachnospiraceae</i>   | <i>Fusicatenibacter</i>             | Age              | -0.13                              | 0.52    | 0.74    |
| <i>Firmicutes</i>       | <i>Clostridia</i>          | <i>Lachnospirales</i>   | <i>Lachnospiraceae</i>   | <i>Agathobacter</i>                 | Age              | 0.050                              | 0.80    | 0.89    |
| <i>Firmicutes</i>       | <i>Clostridia</i>          | <i>Lachnospirales</i>   | <i>Lachnospiraceae</i>   | <i>Coprococcus</i>                  | Age              | 0.050                              | 0.80    | 0.89    |
| <i>Firmicutes</i>       | <i>Clostridia</i>          | <i>Oscillospirales</i>  | <i>Ruminococcaceae</i>   | <i>Faecalibacterium</i>             | Age              | 0.014                              | 0.94    | 0.94    |
| <i>Proteobacteria</i>   | <i>Gammaproteobacteria</i> | <i>Pasteurellales</i>   | <i>Pasteurellaceae</i>   | <i>Haemophilus</i>                  | Disease duration | 0.40                               | 0.037   | 0.37    |
| <i>Actinobacteriota</i> | <i>Coriobacteriia</i>      | <i>Coriobacteriales</i> | <i>Coriobacteriaceae</i> | <i>Collinsella</i>                  | Disease duration | -0.25                              | 0.21    | 0.50    |
| <i>Firmicutes</i>       | <i>Clostridia</i>          | <i>Oscillospirales</i>  | <i>Butyricocccaceae</i>  | <i>Butyricococcus</i>               | Disease duration | 0.24                               | 0.22    | 0.50    |
| <i>Firmicutes</i>       | <i>Clostridia</i>          | <i>Lachnospirales</i>   | <i>Lachnospiraceae</i>   | <i>Ruminococcus torques</i>         | Disease duration | -0.23                              | 0.24    | 0.50    |
| <i>Actinobacteriota</i> | <i>Coriobacteriia</i>      | <i>Coriobacteriales</i> | <i>Eggerthellaceae</i>   | <i>Eggerthella</i>                  | Disease duration | -0.20                              | 0.30    | 0.50    |
| <i>Firmicutes</i>       | <i>Clostridia</i>          | <i>Oscillospirales</i>  | <i>Ruminococcaceae</i>   | <i>Faecalibacterium</i>             | Disease duration | 0.20                               | 0.30    | 0.50    |
| <i>Firmicutes</i>       | <i>Clostridia</i>          | <i>Lachnospirales</i>   | <i>Lachnospiraceae</i>   | <i>Fusicatenibacter</i>             | Disease duration | 0.17                               | 0.38    | 0.54    |
| <i>Firmicutes</i>       | <i>Clostridia</i>          | <i>Lachnospirales</i>   | <i>Lachnospiraceae</i>   | <i>Coprococcus</i>                  | Disease duration | -0.13                              | 0.50    | 0.63    |

|                                |                              |                                |                               |                                                |                        |        |         |          |
|--------------------------------|------------------------------|--------------------------------|-------------------------------|------------------------------------------------|------------------------|--------|---------|----------|
| <i>Firmicutes</i>              | <i>Clostridia</i>            | <i>Lachnospirales</i>          | <i>Lachnospiraceae</i>        | <i>Agathobacter</i>                            | Disease duration       | 0.027  | 0.89    | 0.94     |
| <i>Firmicutes</i>              | <i>Clostridia</i>            | <i>Lachnospirales</i>          | <i>Lachnospiraceae</i>        | <i>Lachnospiraceae_ND3007_grou</i><br><i>p</i> | Disease duration       | 0.016  | 0.94    | 0.94     |
| <u><i>Firmicutes</i></u>       | <u><i>Clostridia</i></u>     | <u><i>Lachnospirales</i></u>   | <u><i>Lachnospiraceae</i></u> | <u><i>Ruminococcus torques</i></u>             | <u>MMSE</u>            | -0.62  | 7.0E-04 | 7.0E-03* |
| <i>Firmicutes</i>              | <i>Clostridia</i>            | <i>Oscillospirales</i>         | <i>Ruminococcaceae</i>        | <i>Faecalibacterium</i>                        | MMSE                   | 0.34   | 0.085   | 0.43     |
| <i>Firmicutes</i>              | <i>Clostridia</i>            | <i>Oscillospirales</i>         | <i>Butyricoccaceae</i>        | <i>Butyricoccus</i>                            | MMSE                   | 0.30   | 0.14    | 0.47     |
| <i>Firmicutes</i>              | <i>Clostridia</i>            | <i>Lachnospirales</i>          | <i>Lachnospiraceae</i>        | <i>Agathobacter</i>                            | MMSE                   | -0.22  | 0.27    | 0.50     |
| <i>Actinobacteriota</i>        | <i>Coriobacteriia</i>        | <i>Coriobacteriales</i>        | <i>Eggerthellaceae</i>        | <i>Eggerthella</i>                             | MMSE                   | 0.19   | 0.35    | 0.50     |
| <i>Firmicutes</i>              | <i>Clostridia</i>            | <i>Lachnospirales</i>          | <i>Lachnospiraceae</i>        | <i>Coprococcus</i>                             | MMSE                   | -0.18  | 0.37    | 0.50     |
| <i>Actinobacteriota</i>        | <i>Coriobacteriia</i>        | <i>Coriobacteriales</i>        | <i>Coriobacteriaceae</i>      | <i>Collinsella</i>                             | MMSE                   | -0.18  | 0.38    | 0.50     |
| <i>Proteobacteria</i>          | <i>Gammaproteobacteria</i>   | <i>Pasteurellales</i>          | <i>Pasteurellaceae</i>        | <i>Haemophilus</i>                             | MMSE                   | -0.17  | 0.40    | 0.50     |
| <i>Firmicutes</i>              | <i>Clostridia</i>            | <i>Lachnospirales</i>          | <i>Lachnospiraceae</i>        | <i>Fusicatenibacter</i>                        | MMSE                   | 0.13   | 0.51    | 0.57     |
| <i>Firmicutes</i>              | <i>Clostridia</i>            | <i>Lachnospirales</i>          | <i>Lachnospiraceae</i>        | <i>Lachnospiraceae_ND3007_grou</i><br><i>p</i> | MMSE                   | 0.081  | 0.69    | 0.69     |
| <u><i>Actinobacteriota</i></u> | <u><i>Coriobacteriia</i></u> | <u><i>Coriobacteriales</i></u> | <u><i>Eggerthellaceae</i></u> | <u><i>Eggerthella</i></u>                      | <u>Total MDS-UPDRS</u> | 0.525  | 4.1E-03 | 0.026*   |
| <u><i>Firmicutes</i></u>       | <u><i>Clostridia</i></u>     | <u><i>Lachnospirales</i></u>   | <u><i>Lachnospiraceae</i></u> | <u><i>Coprococcus</i></u>                      | <u>Total MDS-UPDRS</u> | -0.51  | 5.2E-03 | 0.026*   |
| <i>Firmicutes</i>              | <i>Clostridia</i>            | <i>Oscillospirales</i>         | <i>Ruminococcaceae</i>        | <i>Faecalibacterium</i>                        | Total MDS-UPDRS        | -0.34  | 0.081   | 0.21     |
| <i>Firmicutes</i>              | <i>Clostridia</i>            | <i>Lachnospirales</i>          | <i>Lachnospiraceae</i>        | <i>Agathobacter</i>                            | Total MDS-UPDRS        | -0.33  | 0.085   | 0.21     |
| <i>Firmicutes</i>              | <i>Clostridia</i>            | <i>Lachnospirales</i>          | <i>Lachnospiraceae</i>        | <i>Fusicatenibacter</i>                        | Total MDS-UPDRS        | -0.26  | 0.17    | 0.30     |
| <i>Firmicutes</i>              | <i>Clostridia</i>            | <i>Oscillospirales</i>         | <i>Butyricoccaceae</i>        | <i>Butyricoccus</i>                            | Total MDS-UPDRS        | -0.26  | 0.18    | 0.30     |
| <i>Proteobacteria</i>          | <i>Gammaproteobacteria</i>   | <i>Pasteurellales</i>          | <i>Pasteurellaceae</i>        | <i>Haemophilus</i>                             | Total MDS-UPDRS        | -0.22  | 0.27    | 0.39     |
| <i>Firmicutes</i>              | <i>Clostridia</i>            | <i>Lachnospirales</i>          | <i>Lachnospiraceae</i>        | <i>Lachnospiraceae_ND3007_grou</i><br><i>p</i> | Total MDS-UPDRS        | -0.16  | 0.43    | 0.54     |
| <i>Firmicutes</i>              | <i>Clostridia</i>            | <i>Lachnospirales</i>          | <i>Lachnospiraceae</i>        | <i>Ruminococcus torques</i>                    | Total MDS-UPDRS        | -0.086 | 0.67    | 0.74     |



|                         |                            |                         |                          |                                     |                 |        |         |      |
|-------------------------|----------------------------|-------------------------|--------------------------|-------------------------------------|-----------------|--------|---------|------|
| <i>Actinobacteriota</i> | <i>Coriobacteriia</i>      | <i>Coriobacteriales</i> | <i>Coriobacteriaceae</i> | <i>Collinsella</i>                  | Total MDS-UPDRS | -0.041 | 0.83    | 0.83 |
| <i>Firmicutes</i>       | <i>Clostridia</i>          | <i>Lachnospirales</i>   | <i>Lachnospiraceae</i>   | <i>Coproccoccus</i>                 | MDS-UPDRS III   | -0.51  | 6.1E-03 | 0.05 |
| <i>Actinobacteriota</i> | <i>Coriobacteriia</i>      | <i>Coriobacteriales</i> | <i>Eggerthellaceae</i>   | <i>Eggerthella</i>                  | MDS-UPDRS III   | 0.48   | 0.010   | 0.05 |
| <i>Firmicutes</i>       | <i>Clostridia</i>          | <i>Oscillospirales</i>  | <i>Ruminococcaceae</i>   | <i>Faecalibacterium</i>             | MDS-UPDRS III   | -0.36  | 0.062   | 0.21 |
| <i>Firmicutes</i>       | <i>Clostridia</i>          | <i>Lachnospirales</i>   | <i>Lachnospiraceae</i>   | <i>Agathobacter</i>                 | MDS-UPDRS III   | -0.30  | 0.11    | 0.25 |
| <i>Firmicutes</i>       | <i>Clostridia</i>          | <i>Lachnospirales</i>   | <i>Lachnospiraceae</i>   | <i>Fusicatenibacter</i>             | MDS-UPDRS III   | -0.28  | 0.14    | 0.25 |
| <i>Firmicutes</i>       | <i>Clostridia</i>          | <i>Oscillospirales</i>  | <i>Butyricocccaceae</i>  | <i>Butyricococcus</i>               | MDS-UPDRS III   | -0.28  | 0.15    | 0.25 |
| <i>Firmicutes</i>       | <i>Clostridia</i>          | <i>Lachnospirales</i>   | <i>Lachnospiraceae</i>   | <i>Lachnospiraceae_ND3007_group</i> | MDS-UPDRS III   | -0.25  | 0.20    | 0.29 |
| <i>Proteobacteria</i>   | <i>Gammaproteobacteria</i> | <i>Pasteurellales</i>   | <i>Pasteurellaceae</i>   | <i>Haemophilus</i>                  | MDS-UPDRS III   | -0.17  | 0.38    | 0.48 |
| <i>Firmicutes</i>       | <i>Clostridia</i>          | <i>Lachnospirales</i>   | <i>Lachnospiraceae</i>   | <i>Ruminococcus torques</i>         | MDS-UPDRS III   | -0.075 | 0.70    | 0.78 |
| <i>Actinobacteriota</i> | <i>Coriobacteriia</i>      | <i>Coriobacteriales</i> | <i>Coriobacteriaceae</i> | <i>Collinsella</i>                  | MDS-UPDRS III   | 0.018  | 0.93    | 0.93 |

Bacteria and clinical features with  $q$ -values less than 0.05 are underlined.

\* $Q$ -value less than 0.05

**Supplementary Figure 1. Random forest models and essential intestinal genera to differentiate controls and DLB**

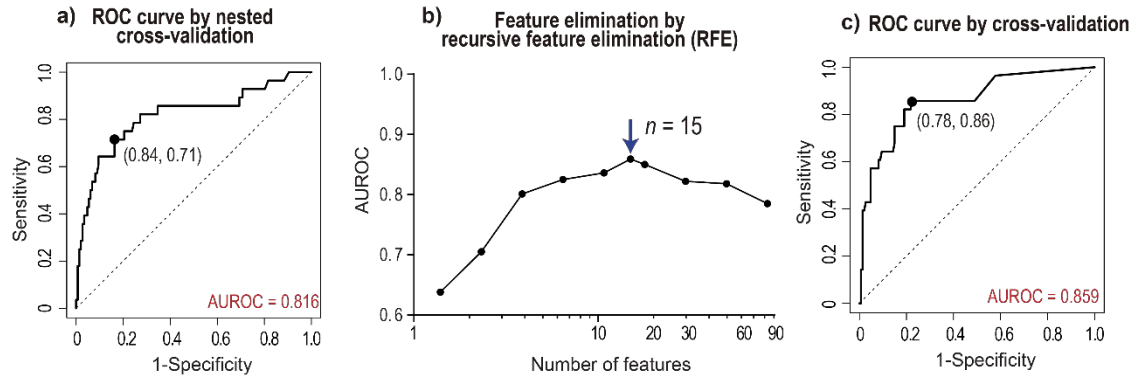

**(a)** ROC curve of nested cross-validation of random forest models to differentiate controls and DLB. The optimal point by Youden index is indicated by a dot with the specificity and sensitivity in parentheses. **(b)** A plot of the area under the receiver operating characteristics curve (AUROC) by leave-one-out cross-validation of random forest models, while genera (features) were recursively eliminated. An arrow points to the maximum AUROC with the number of genera. Fifteen genera that made the maximum AUROC are indicated in Supplementary Table 4. **(c)** ROC curve of leave-one-out cross-validation of random forest models generated with 15 genera indicated by an arrow in **(b)**. The optimal point by Youden index is indicated by a dot with the specificity and sensitivity in parentheses.

**Supplementary Figure 2. Random forest models and essential intestinal genera to differentiate controls and PD**

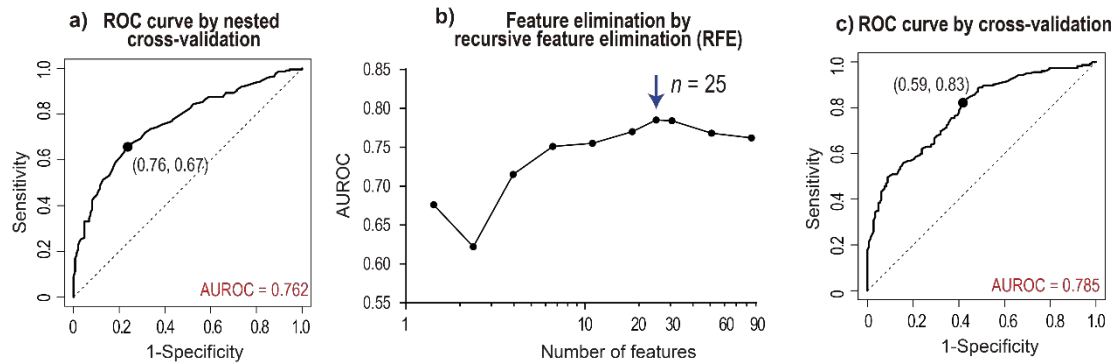

**(a)** ROC curves of nested cross-validation of random forest models to differentiate controls and PD. The optimal point by Youden index is indicated by a dot with the specificity and sensitivity in parentheses. **(b)** A plot of the area under the receiver operating characteristics curve (AUROC) by leave-one-out cross-validation of random forest models, while genera (features) were recursively eliminated. An arrow points to the maximum AUROC with the number of genera. Twenty-five genera that made the maximum AUROC are indicated in Supplementary Table 5. **(c)** ROC curves of leave-one-out cross-validation of random forest models generated with 25 genera indicated by an arrow in **(b)**. The optimal point by Youden index is indicated by a dot with the specificity and sensitivity in parentheses.

Supplementary Figure 3. Plots of relative abundances of four genera (*Ruminococcus torques*, *Bifidobacterium*, *Collinsella*, and *Ruminococcus gnavus*) in controls ( $n = 147$ ), iRBD ( $n = 26$ ), PD ( $n = 224$ ), and DLB ( $n = 28$ )

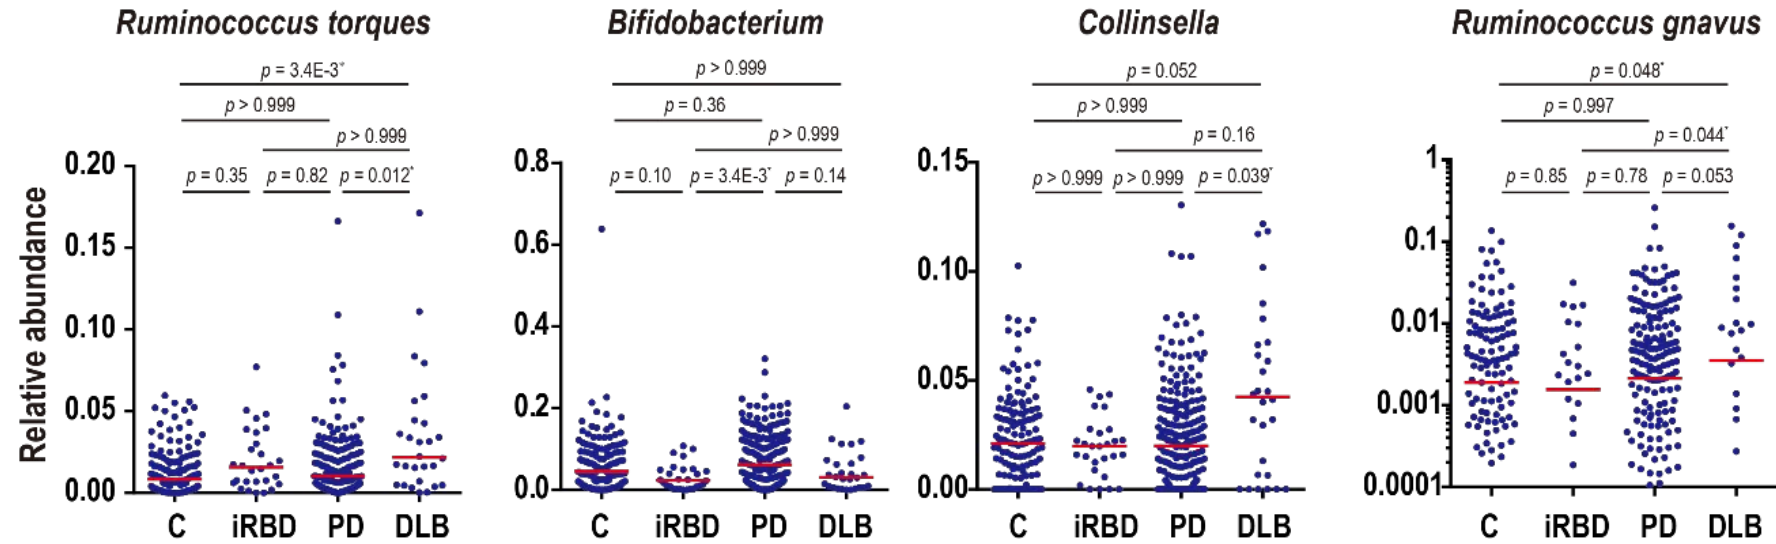

$P$ -values by Kruskal-Wallis test were all less than 0.05.  $P$ -values by Dunn's post hoc test are indicated with an asterisk for  $p < 0.05$ .

Supplementary Figure 4. Relative abundances of *Bifidobacterium*

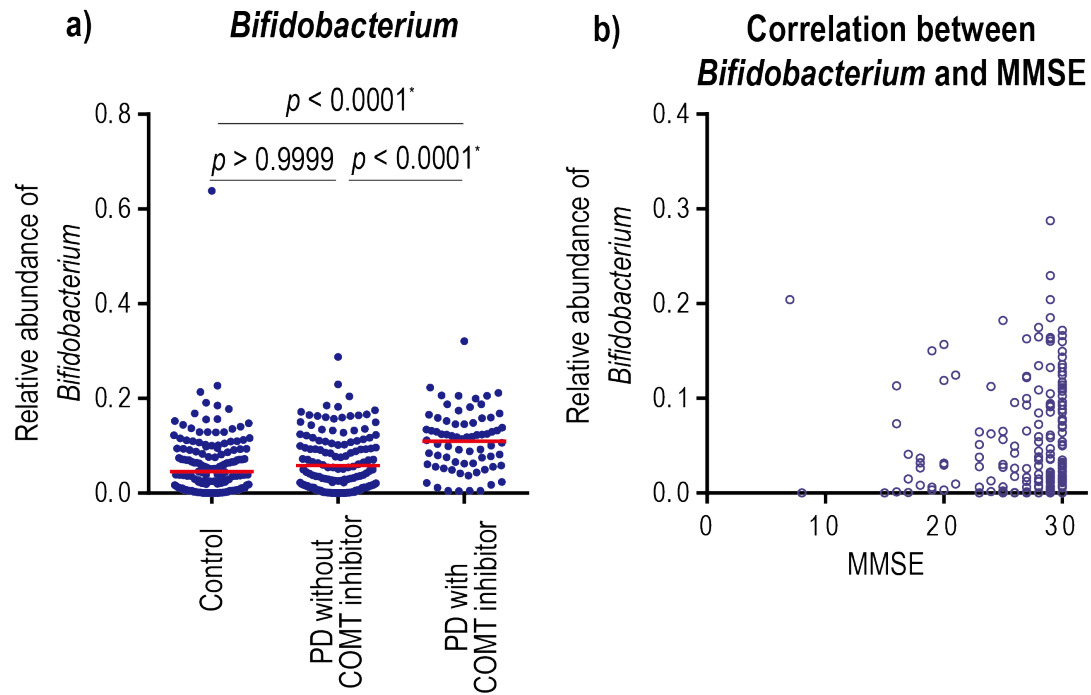

- (a) Relative abundances of *Bifidobacterium* in controls ( $n = 147$ ), PD without COMT inhibitor ( $n = 153$ ), and PD with COMT inhibitor ( $n = 71$ ).  $P$ -value by Kruskal-Wallis test was less than 0.05.  $P$ -values by Dunn's post hoc test are indicated with an asterisk for  $p < 0.05$ .
- (b) Scatter plot of *Bifidobacterium* and Mini Mental State Examination (MMSE) in patients with PD and DLB, who were not taking COMT inhibitors.  $\rho = 0.19$  and  $p = 0.014$  by Spearman's rank correlation coefficient test.
